# Supplementary material for: Microwave-assisted heteropolyanion-based ionic liquid promoted sustainable protocol to N-heteroaryl amides via N-directing dual catalyzed oxidative amidation of aldehydes
Source: Royal Society of Chemistry journal article supplement (doi:10.1039/c6ra20961k), 2016-01-01

**Electronic Supplementary Information (ESI)**

**Microwave-assisted Heteropolyanion-based Ionic Liquids Promoted Sustainable Protocol to N-heteroaryl Amides via N-directing Dual Catalyzed Oxidative Amidation of Aldehydes**

Renzhong Fu, Yang Yang,\* Weihua Jin, Hui Gu, XiaoJun Zeng, Wen Chai, Yunsheng Ma,  
Quan Wang, Jun Yi\* and Rongxin Yuan

*Jiangsu Laboratory of Advanced Functional Material, School of Chemistry and Materials Engineering,  
Changshu Institute of Technology, Changshu 215500, PR China*

# NMR spectra of N-heteroaryl amides

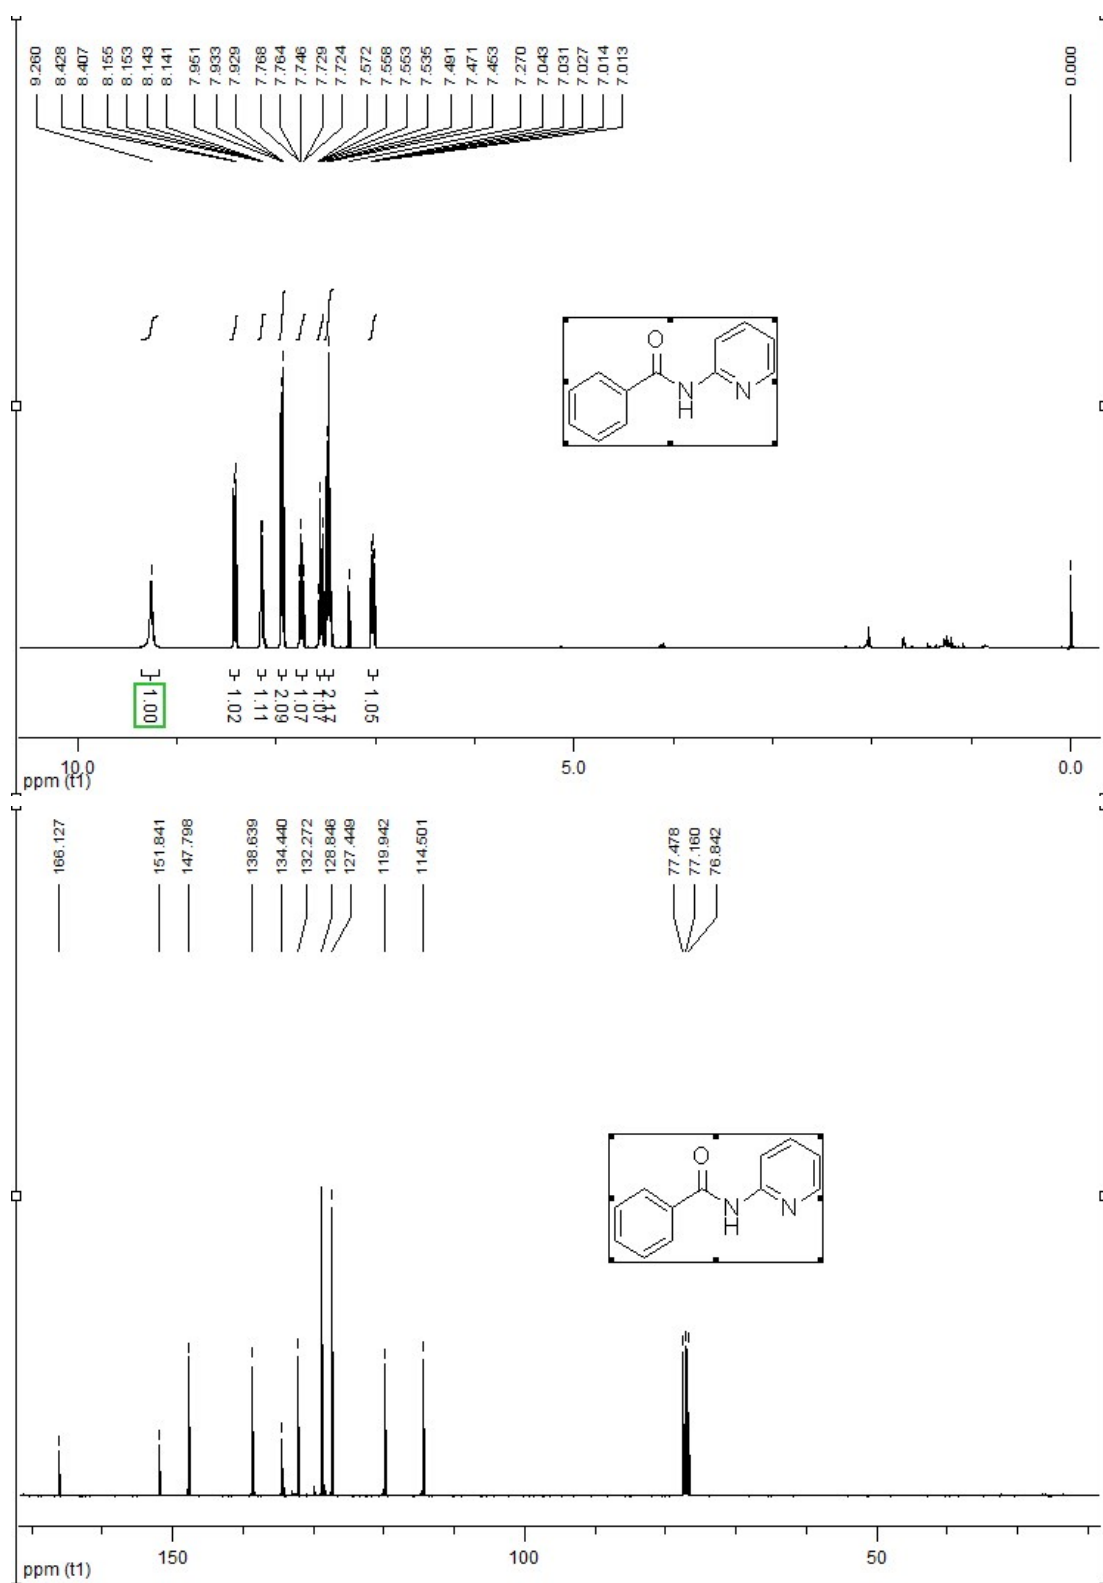

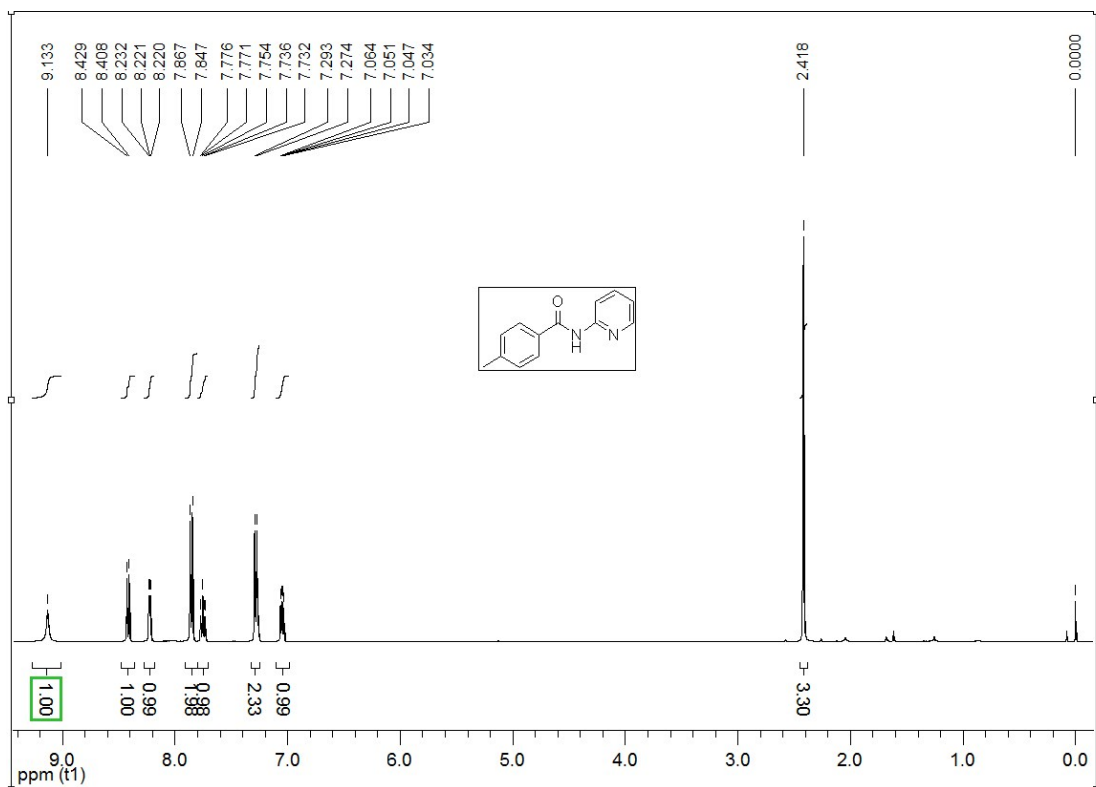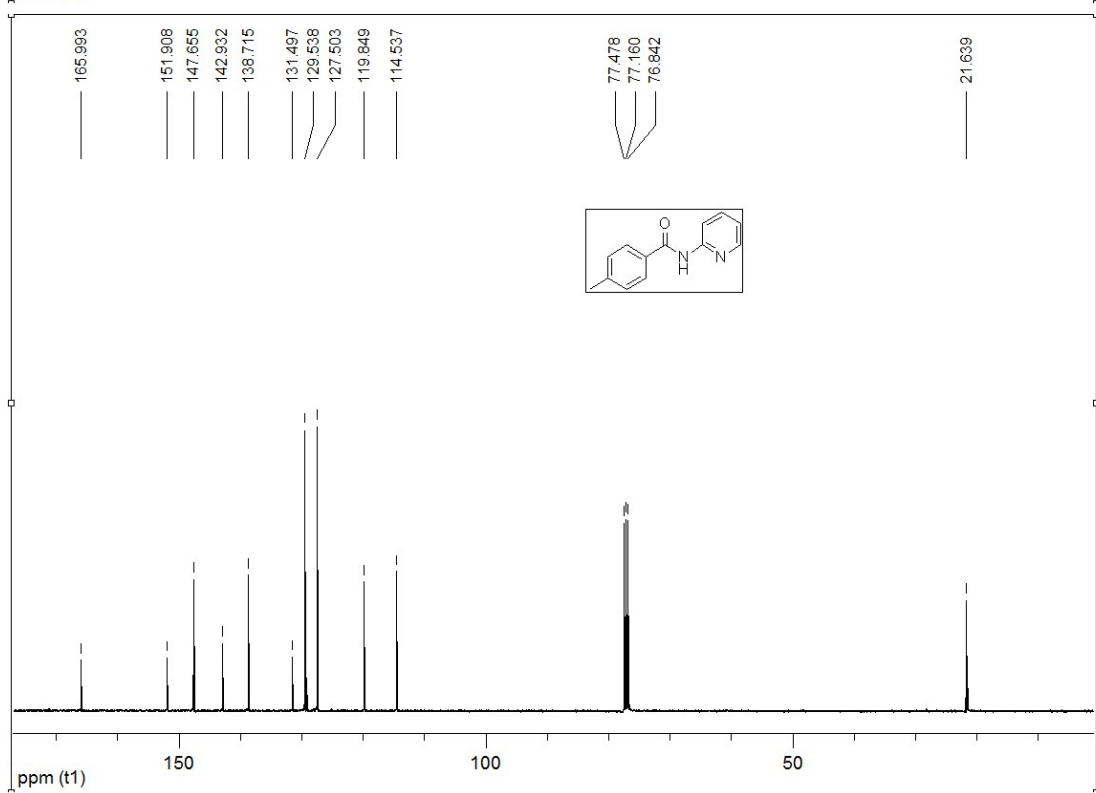

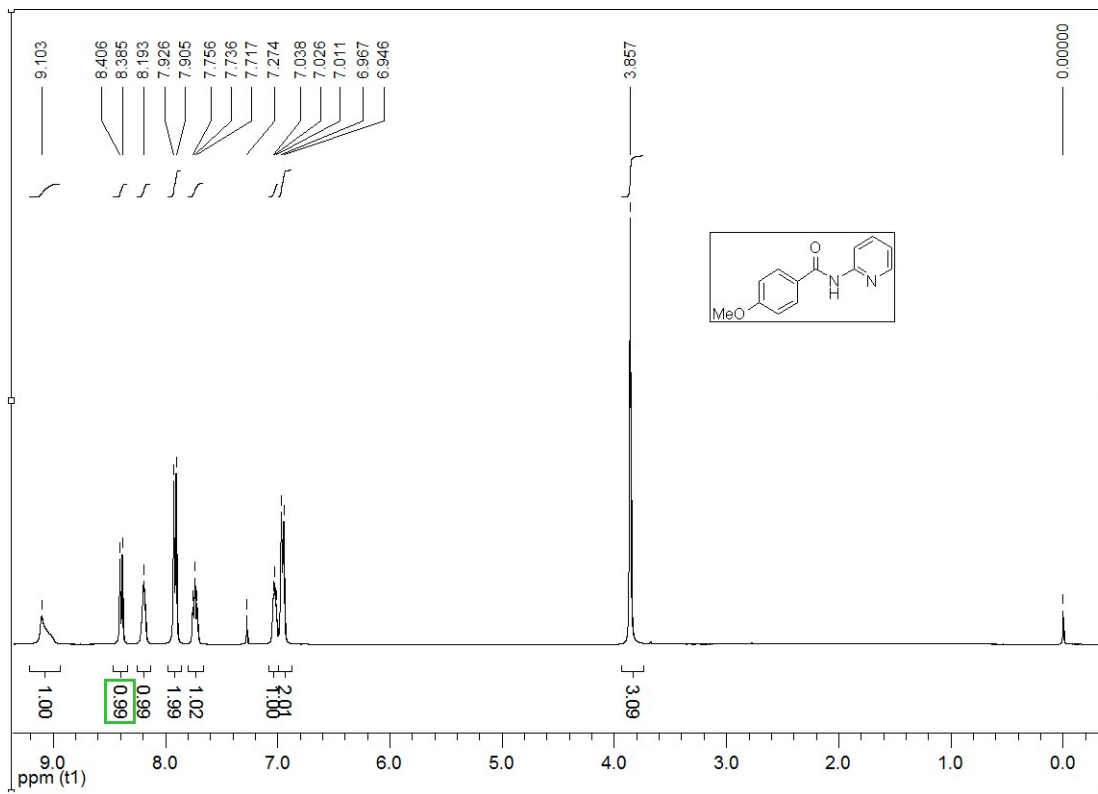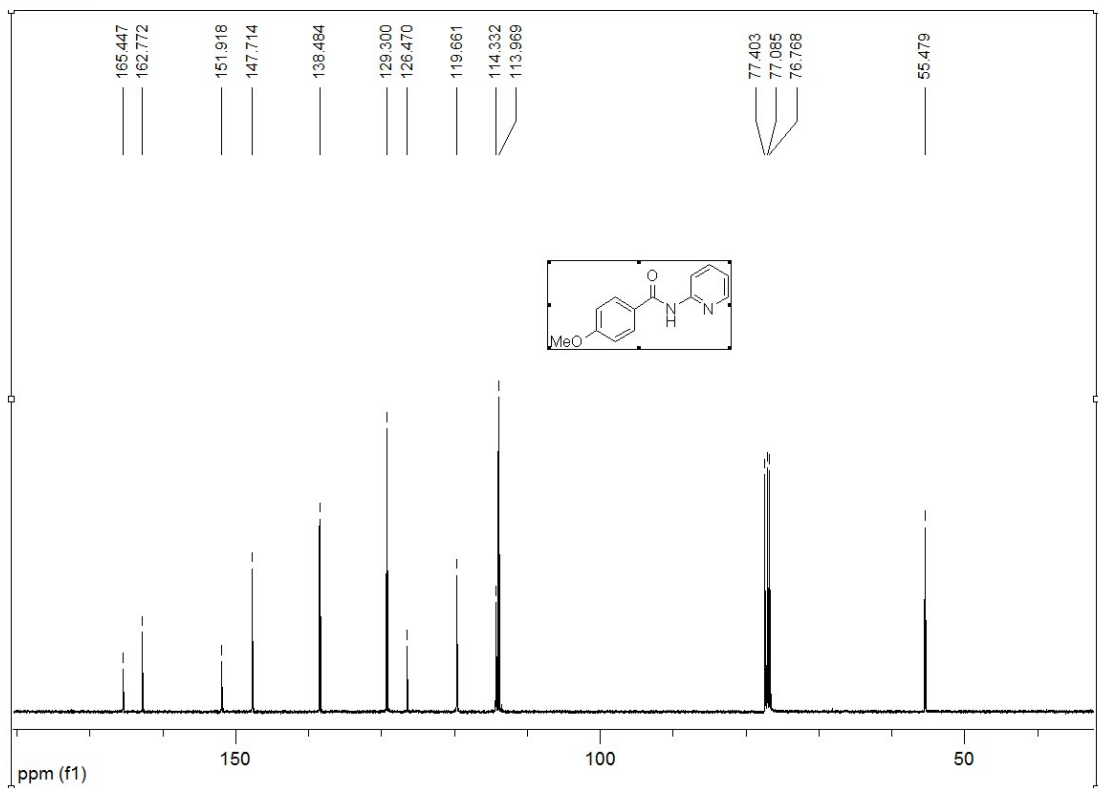

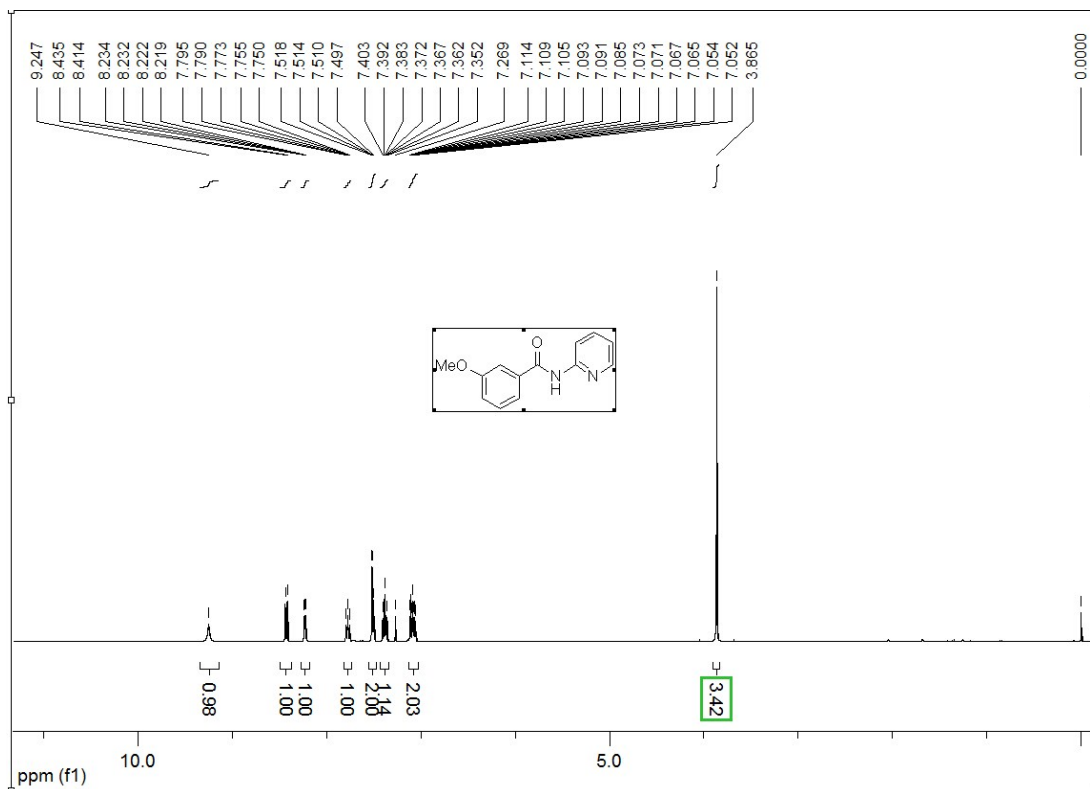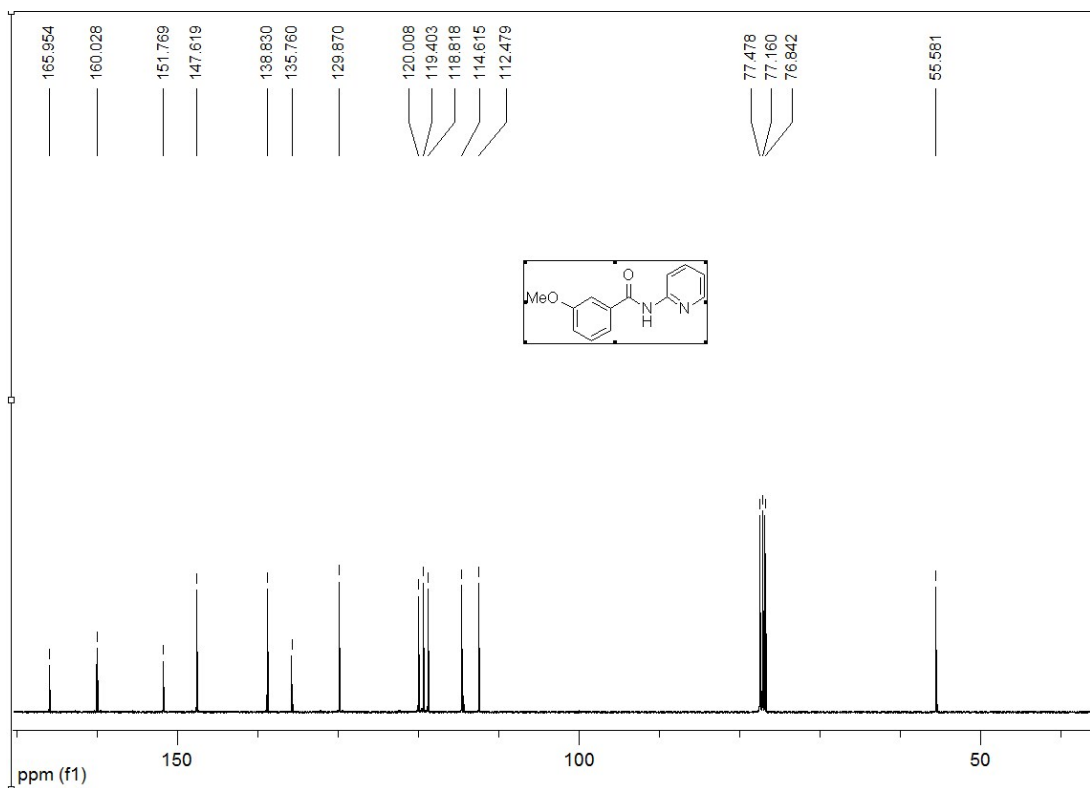

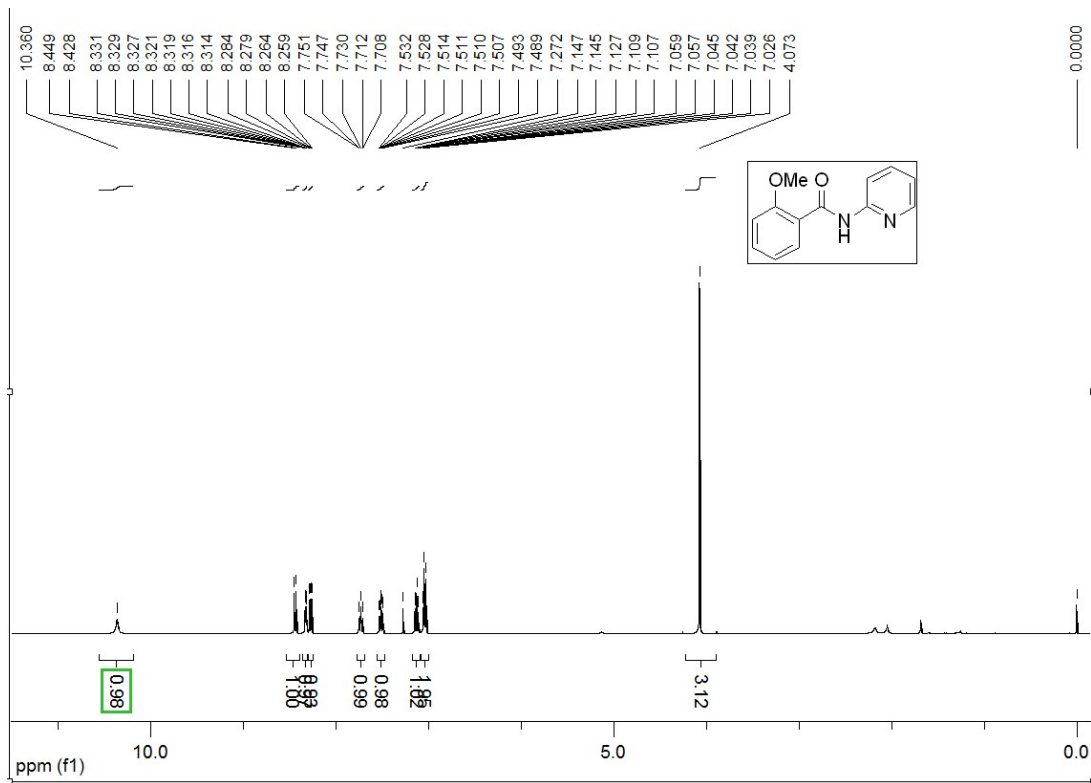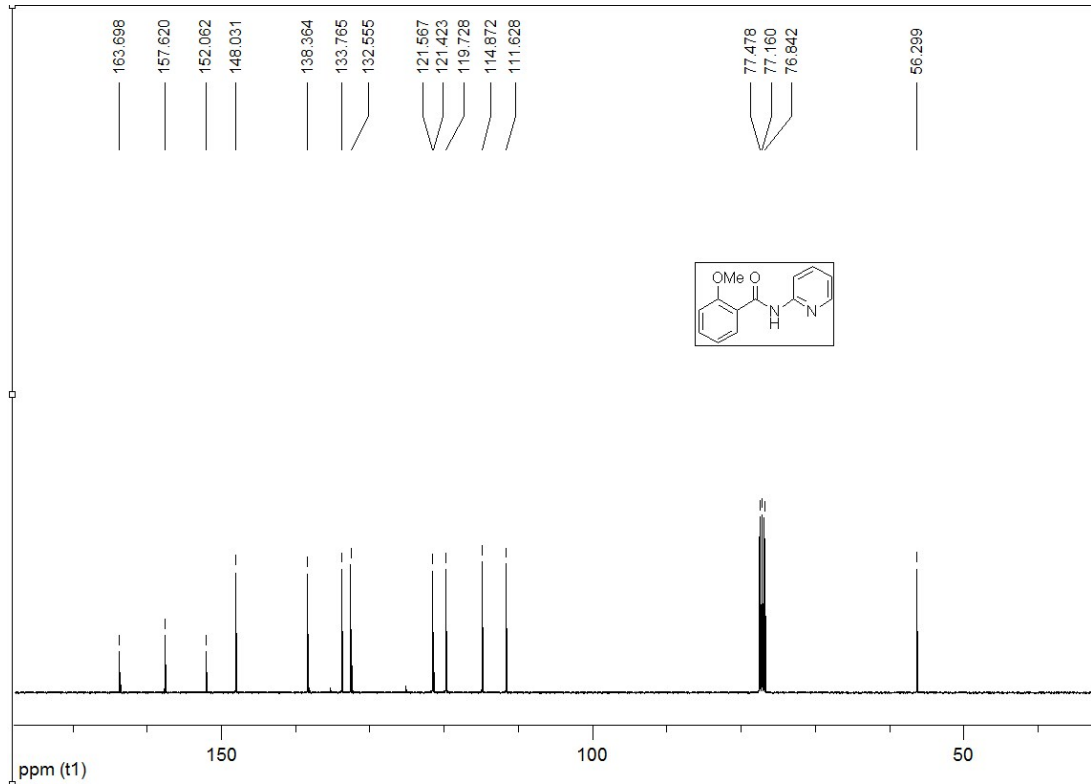

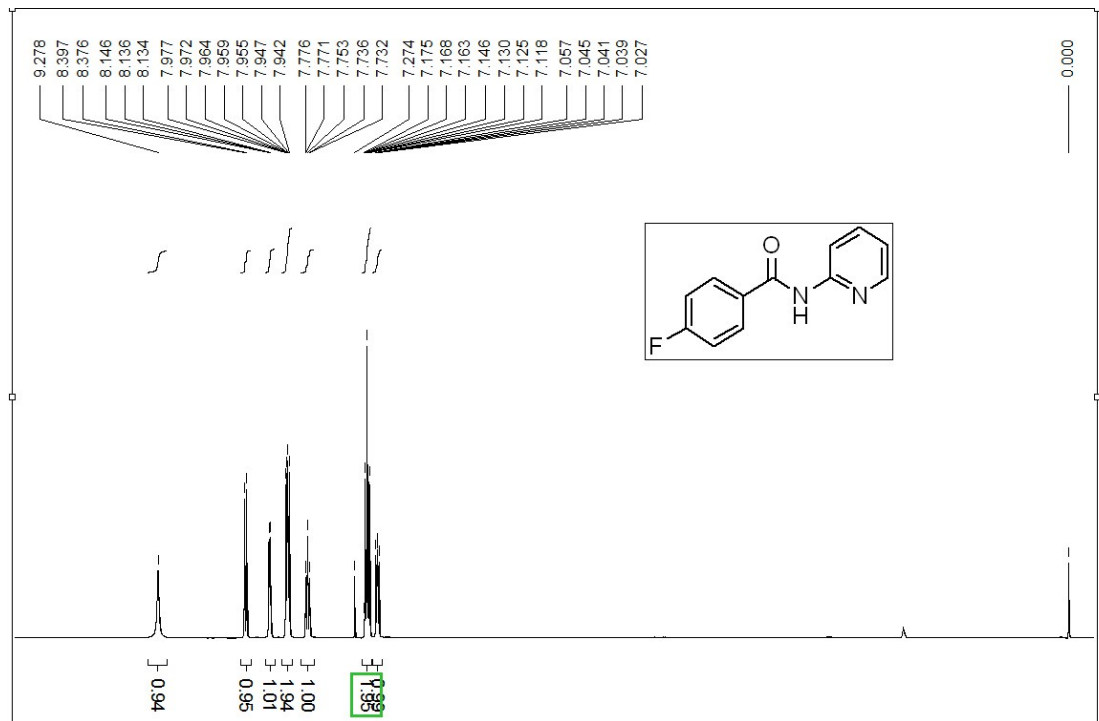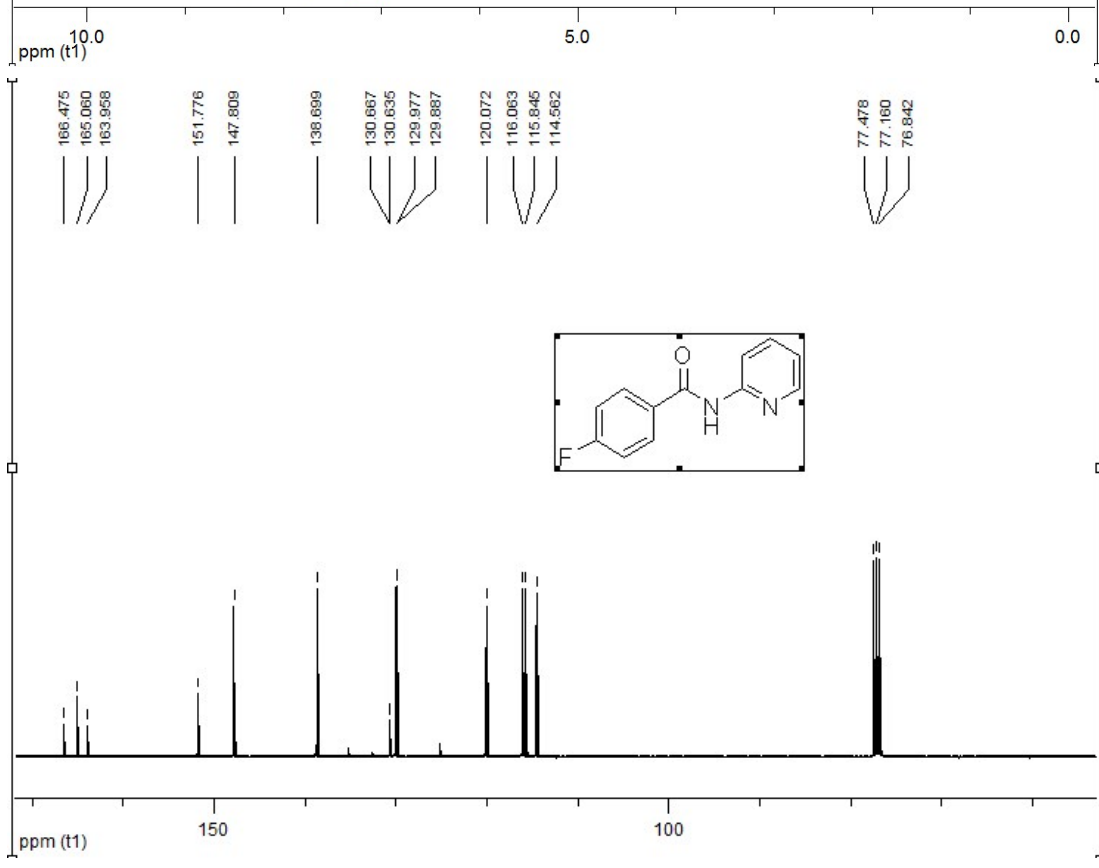

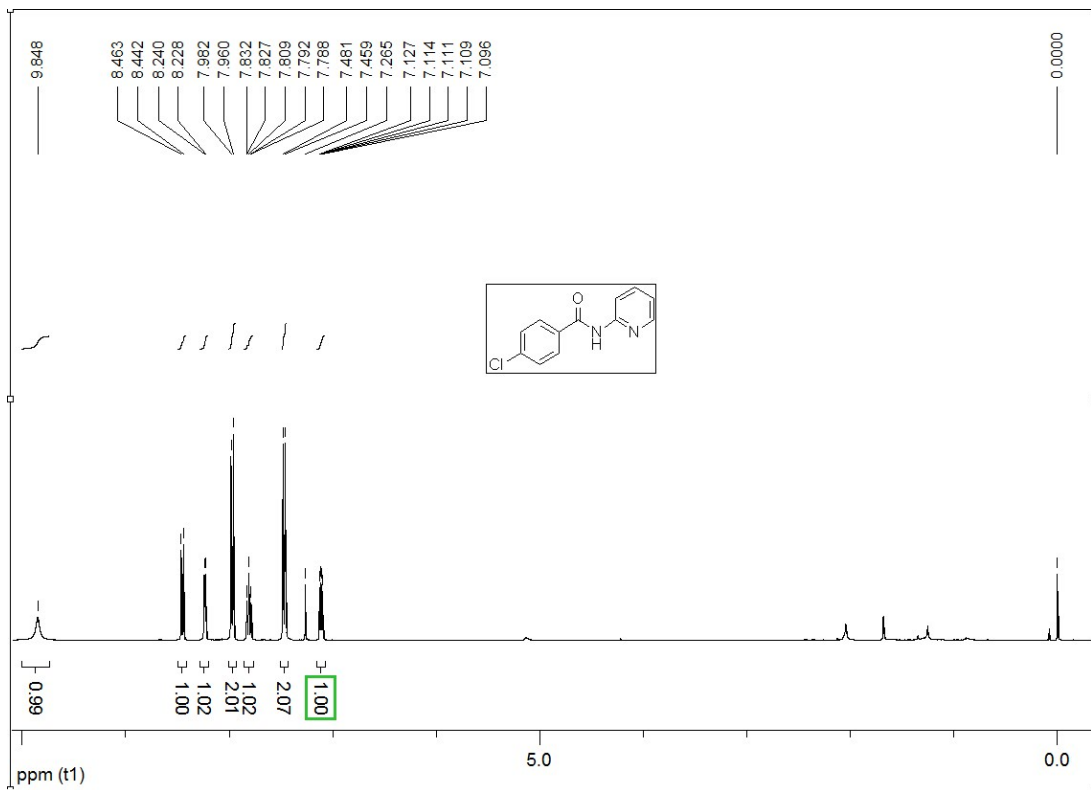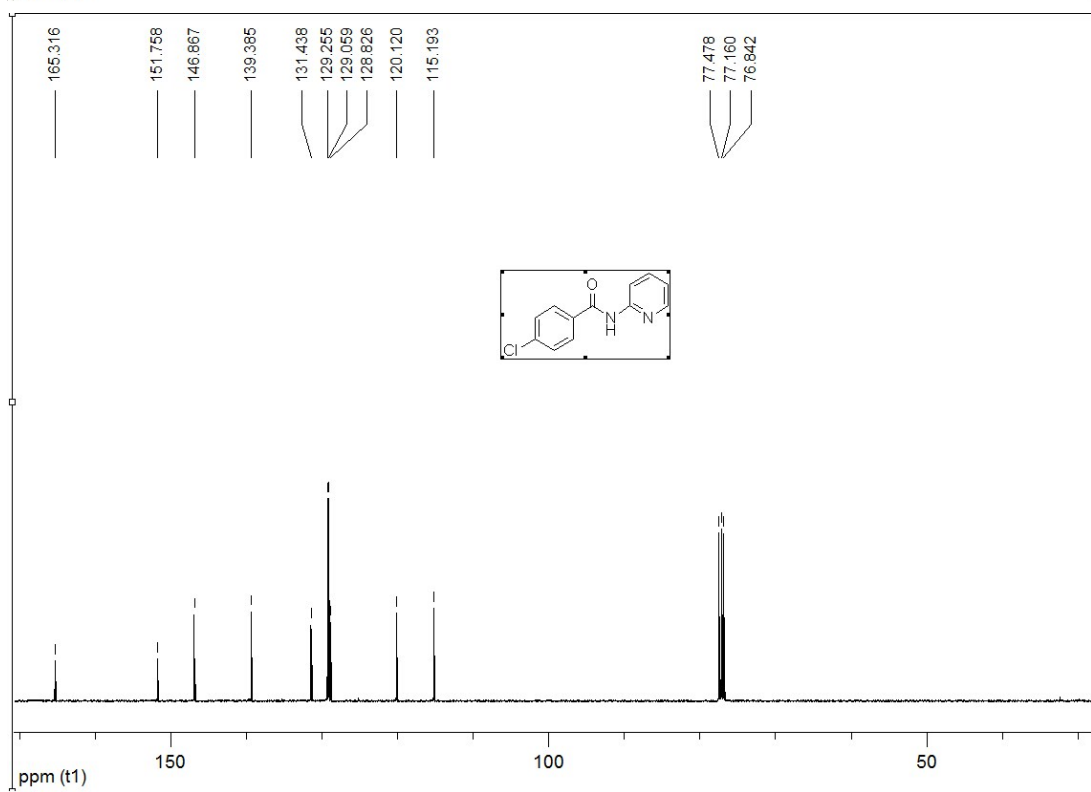



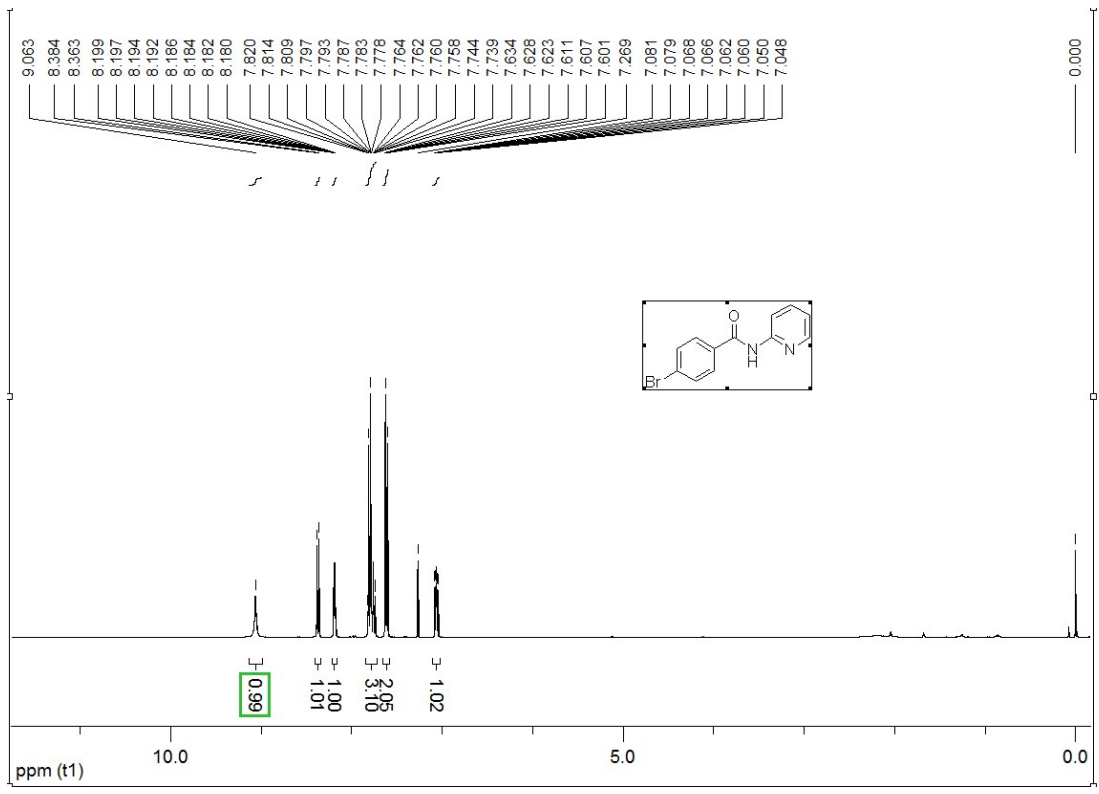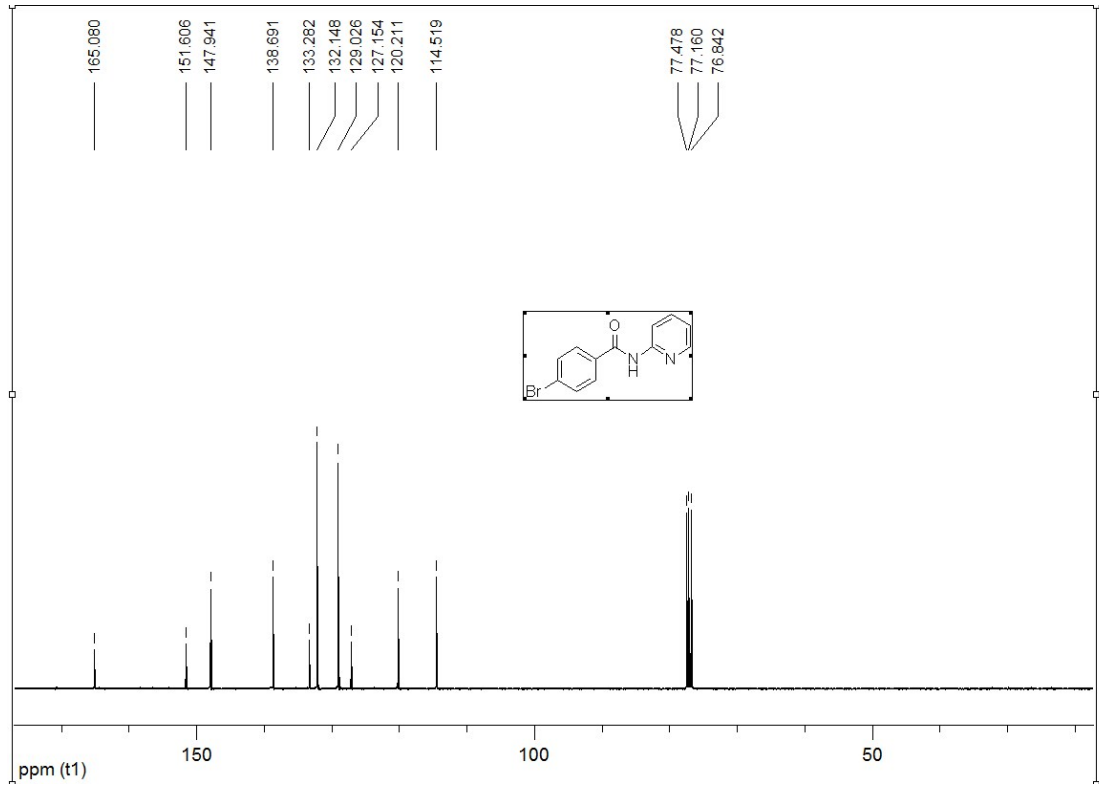

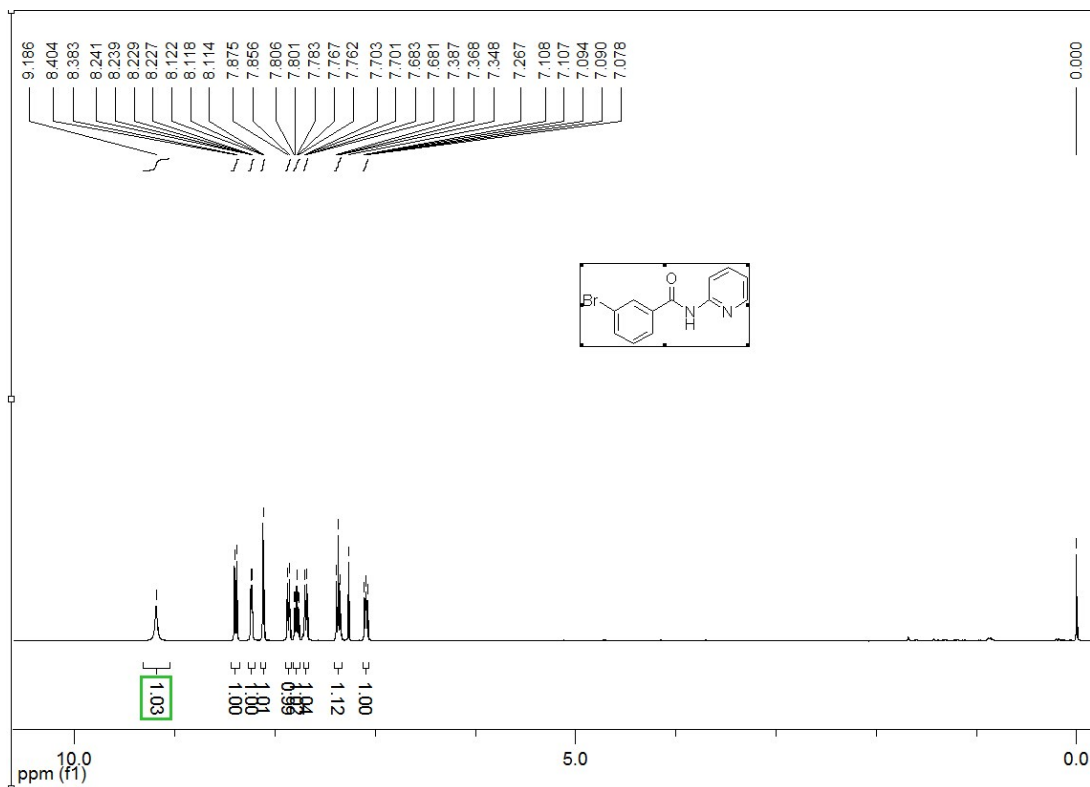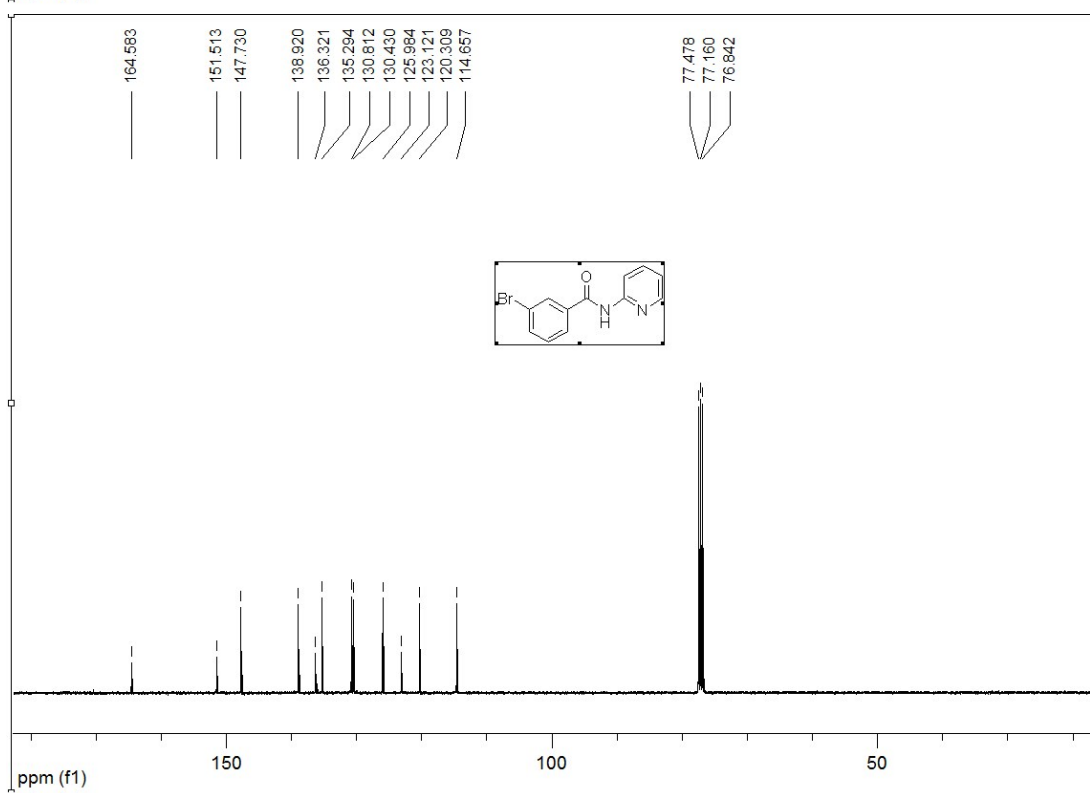

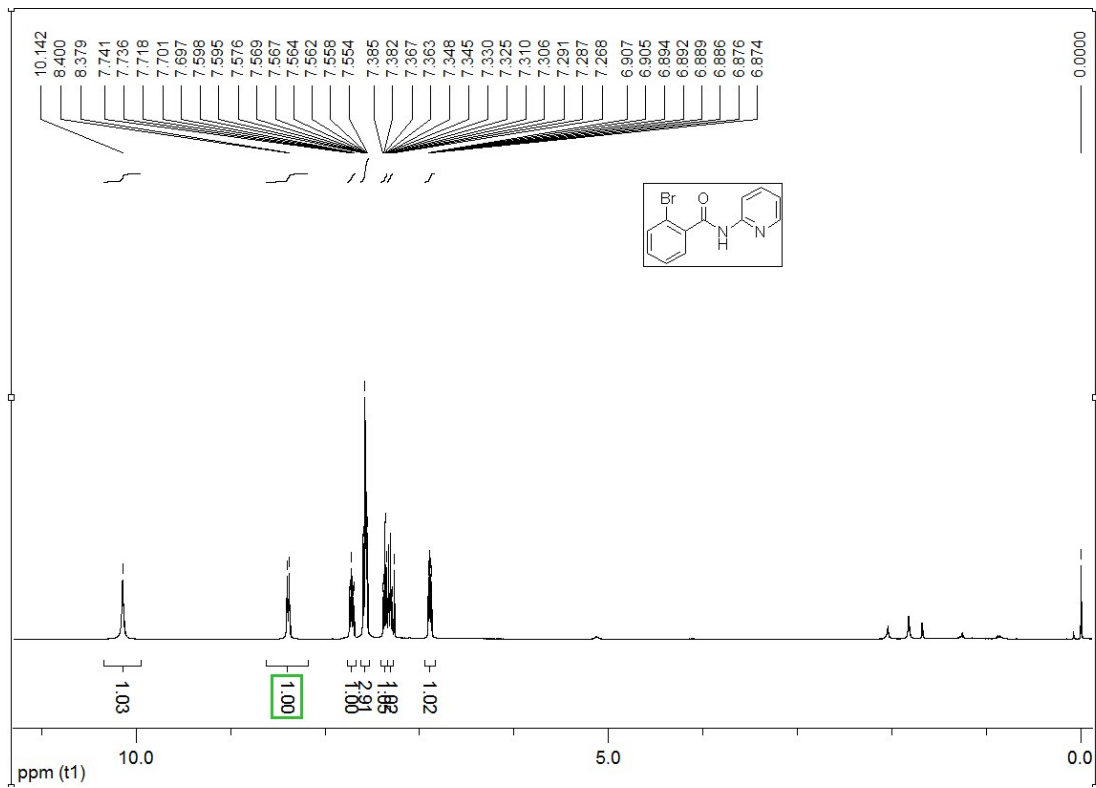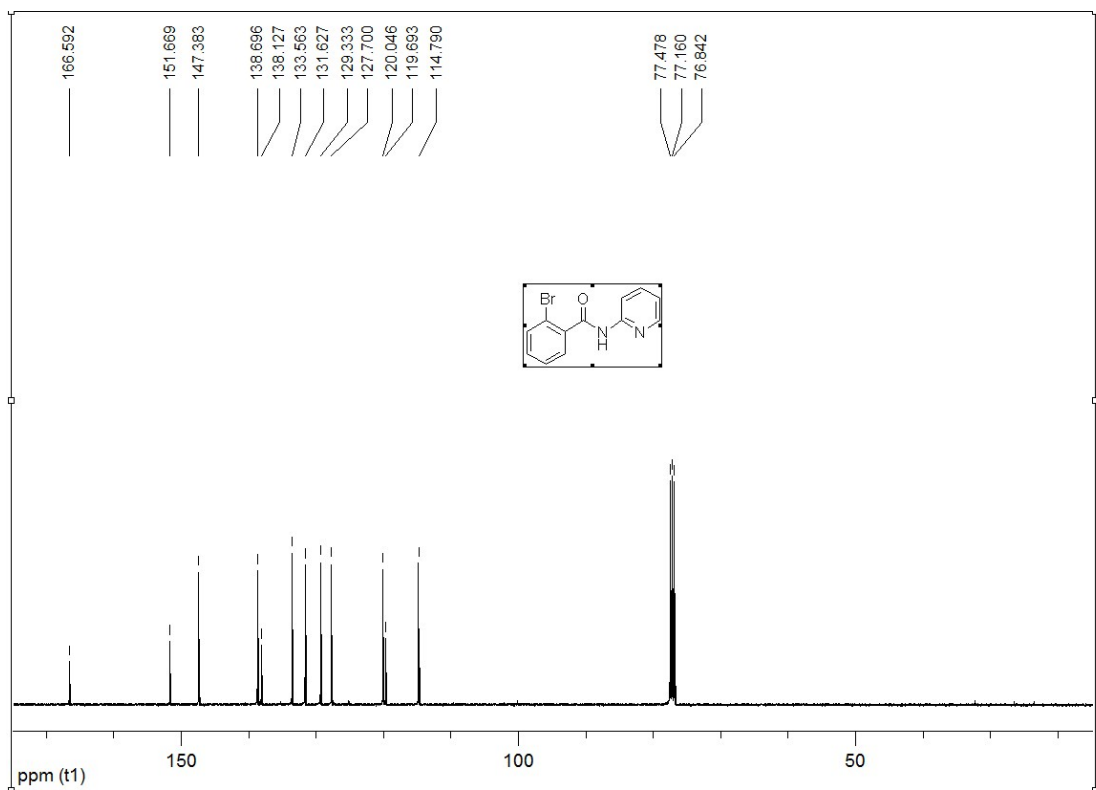

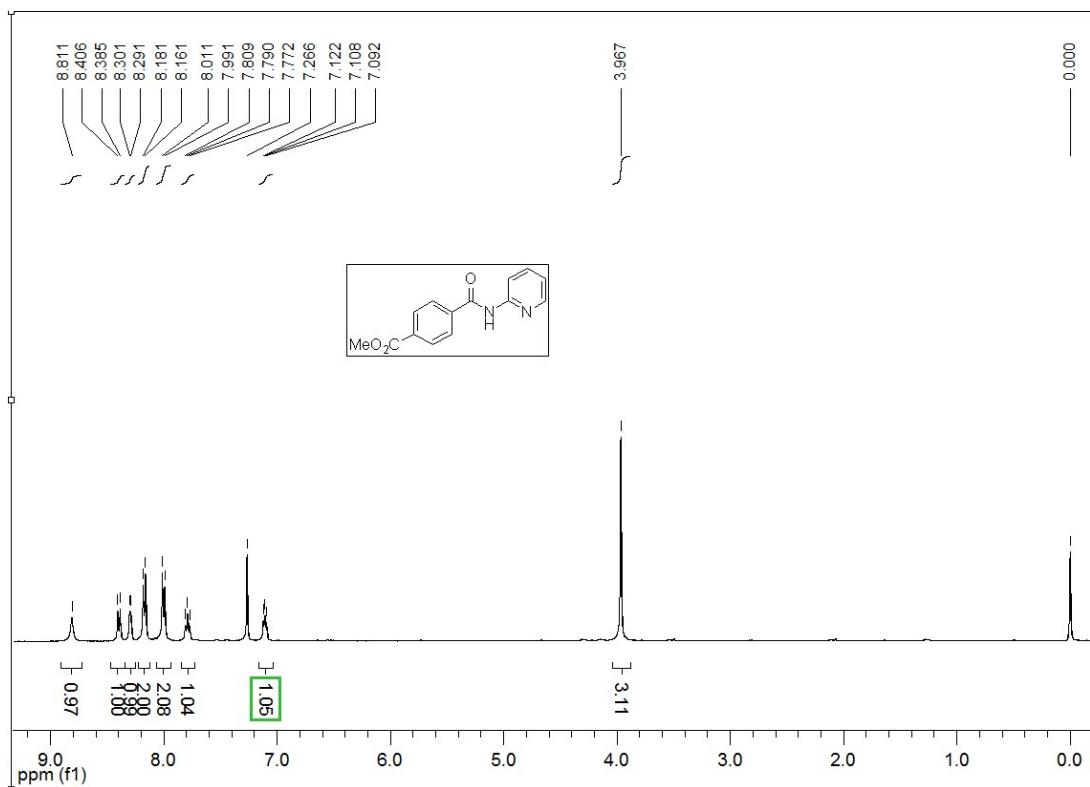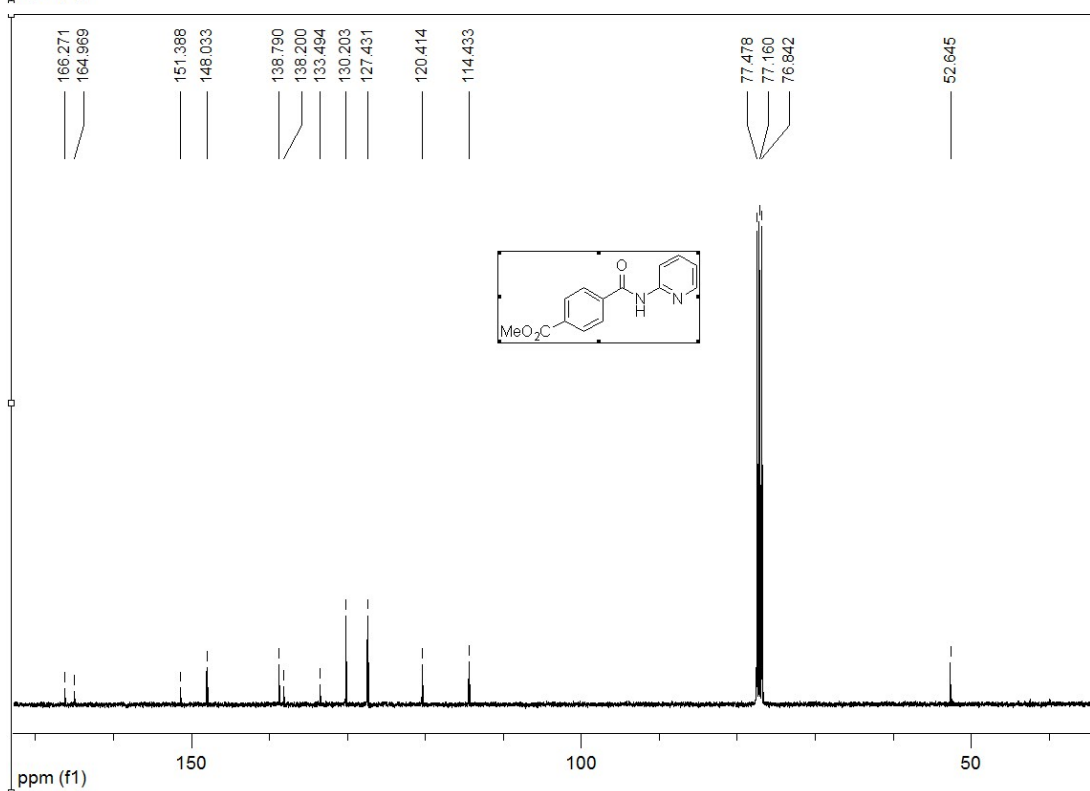

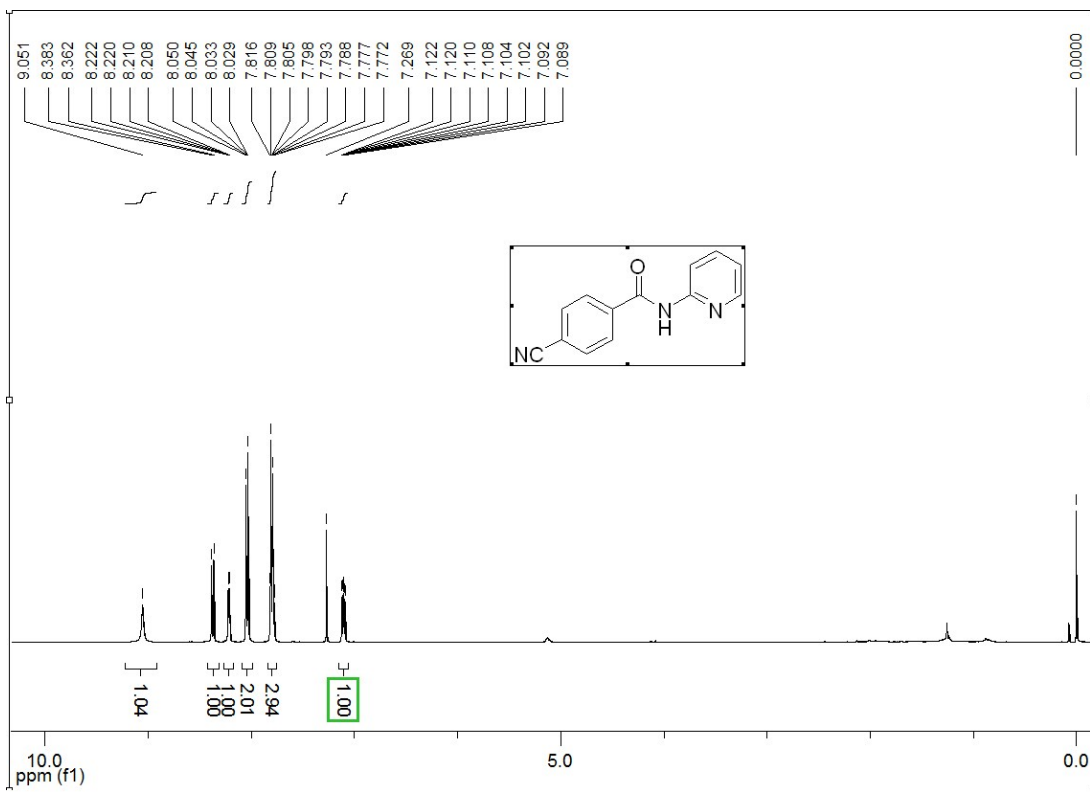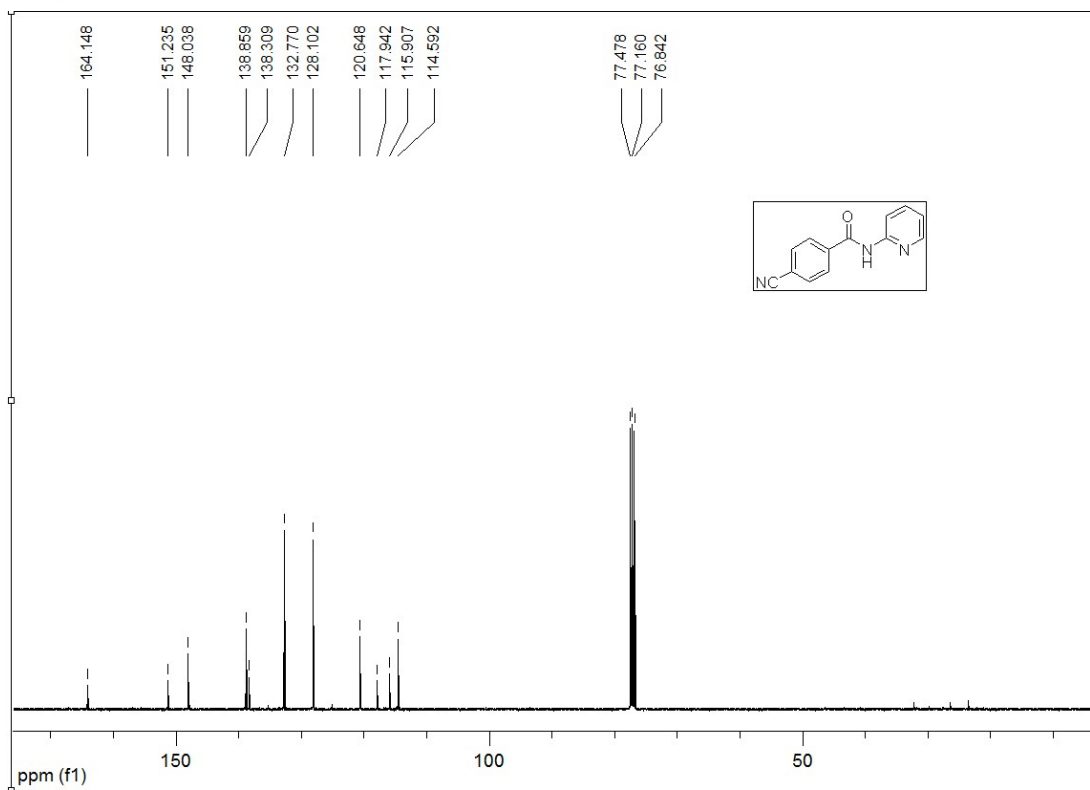

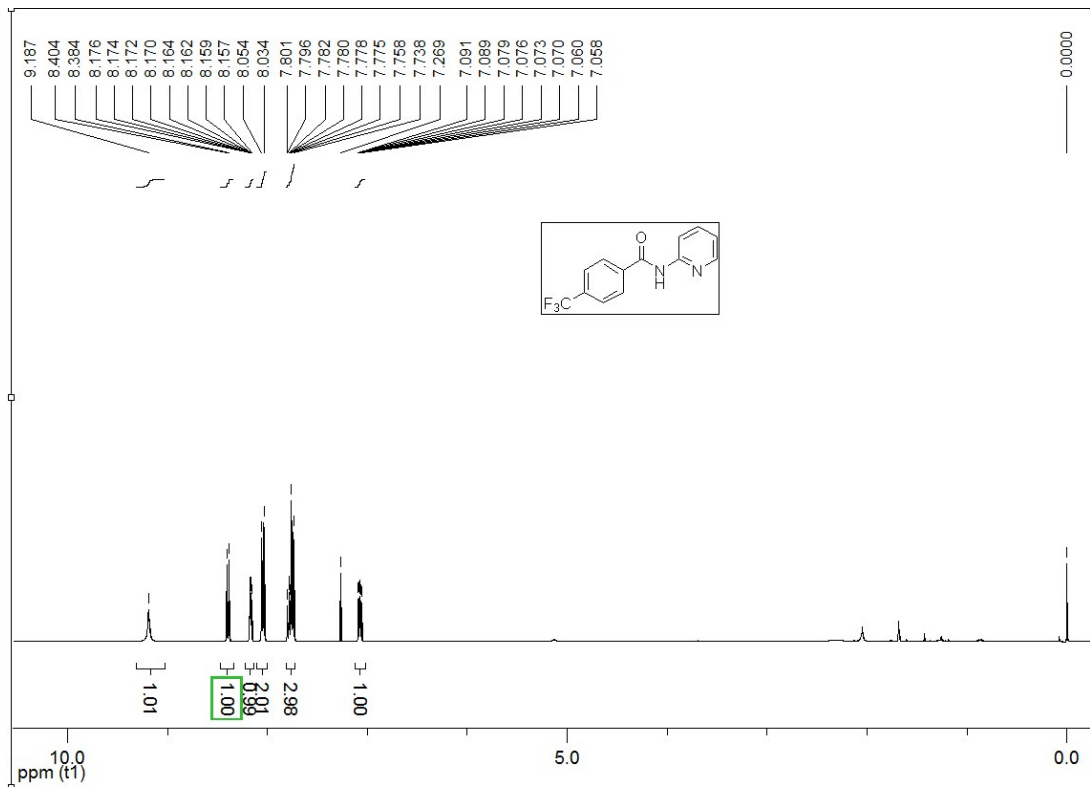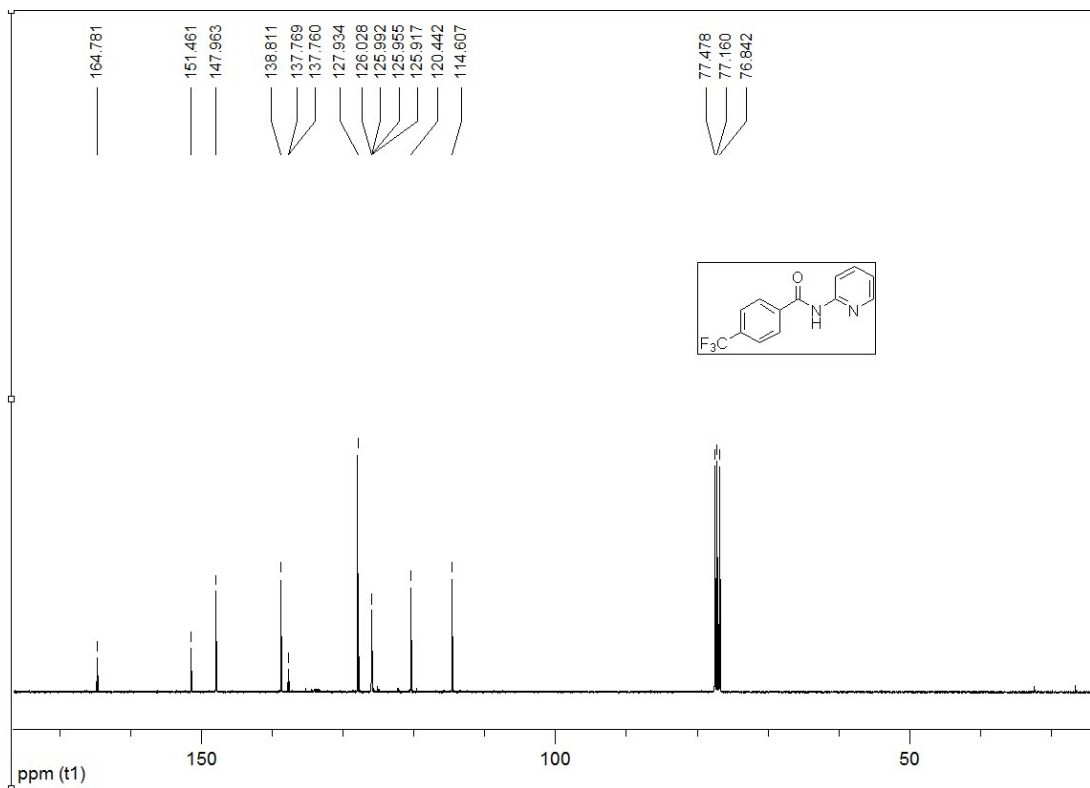

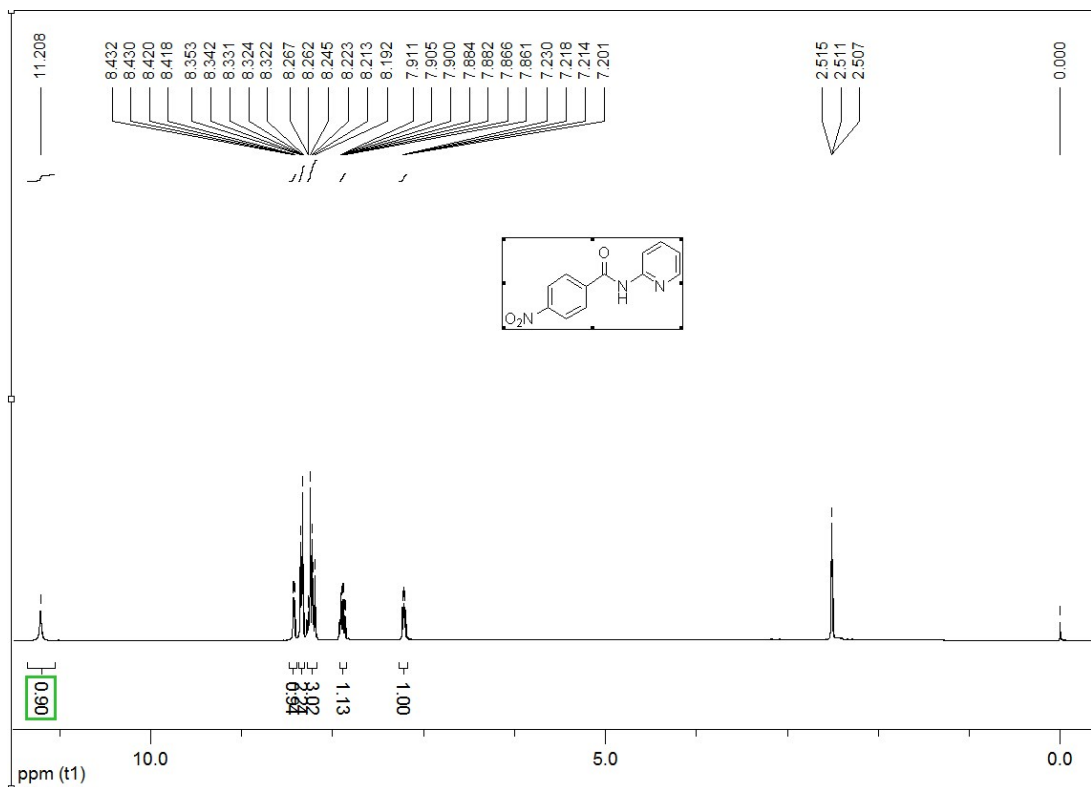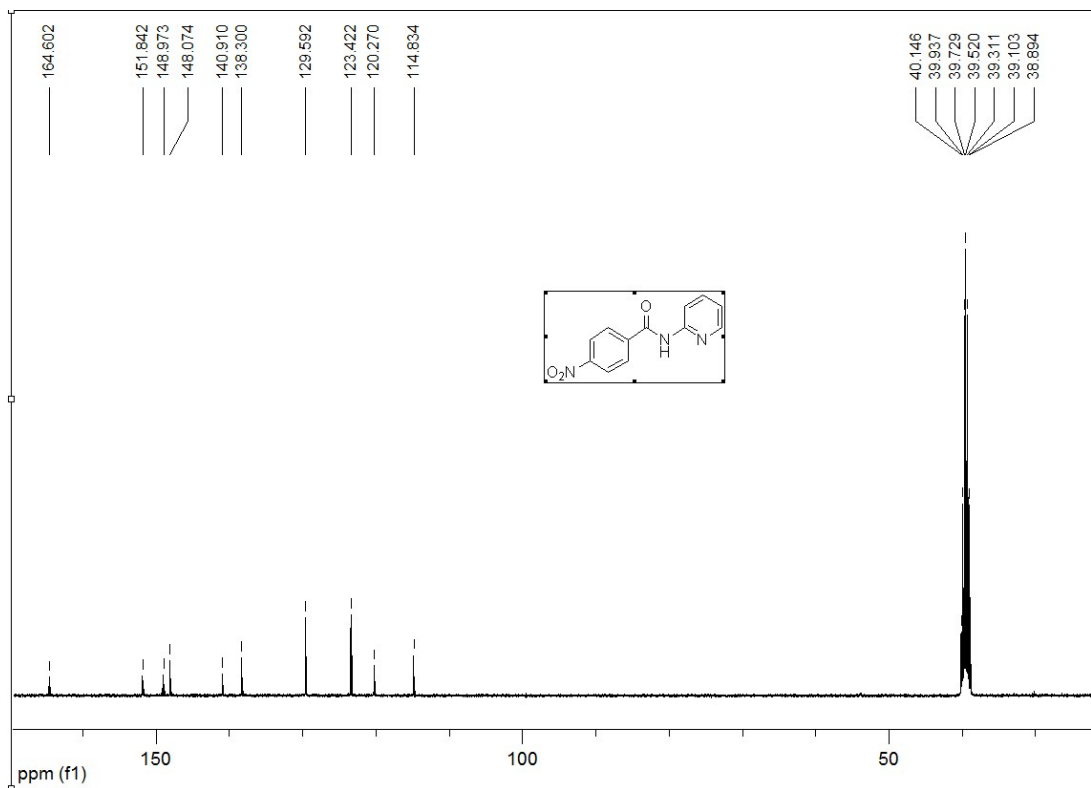

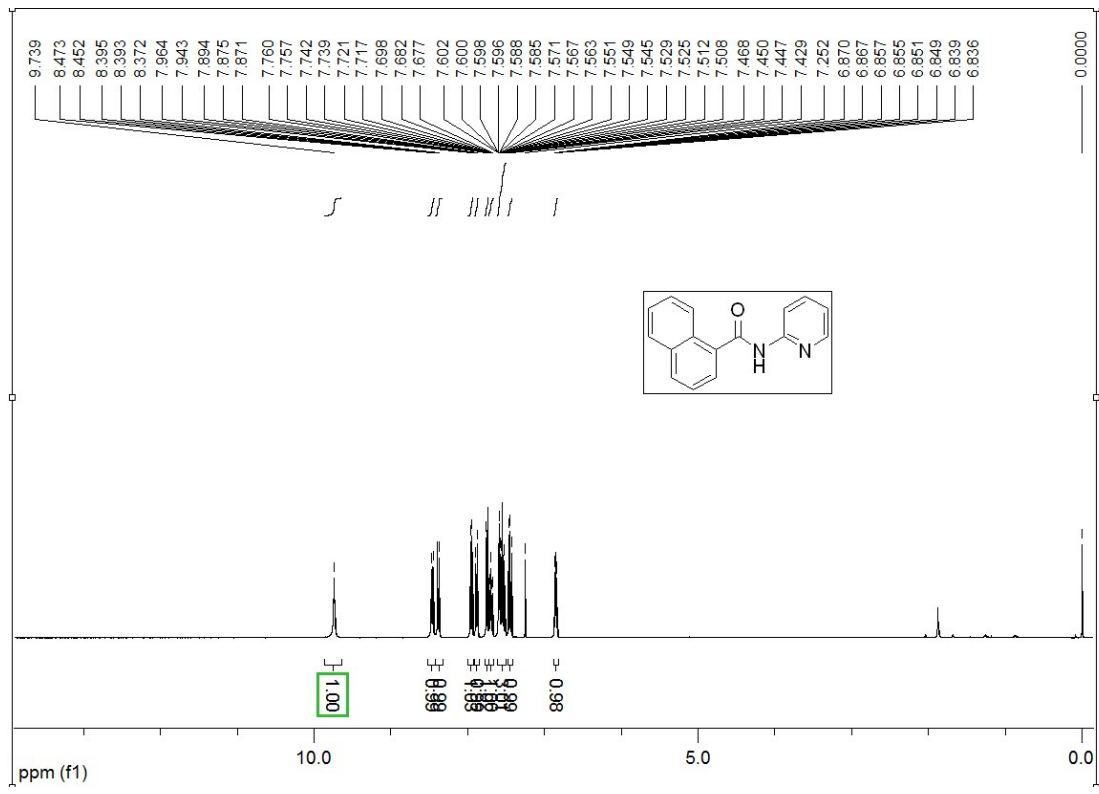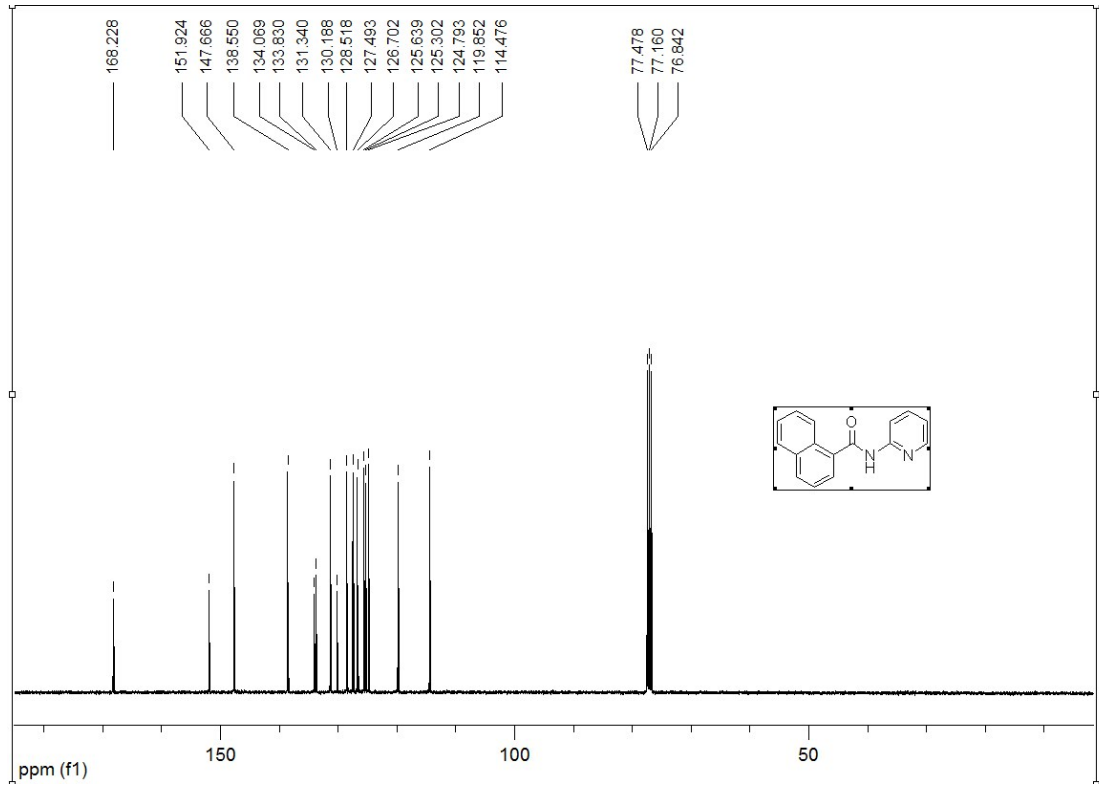



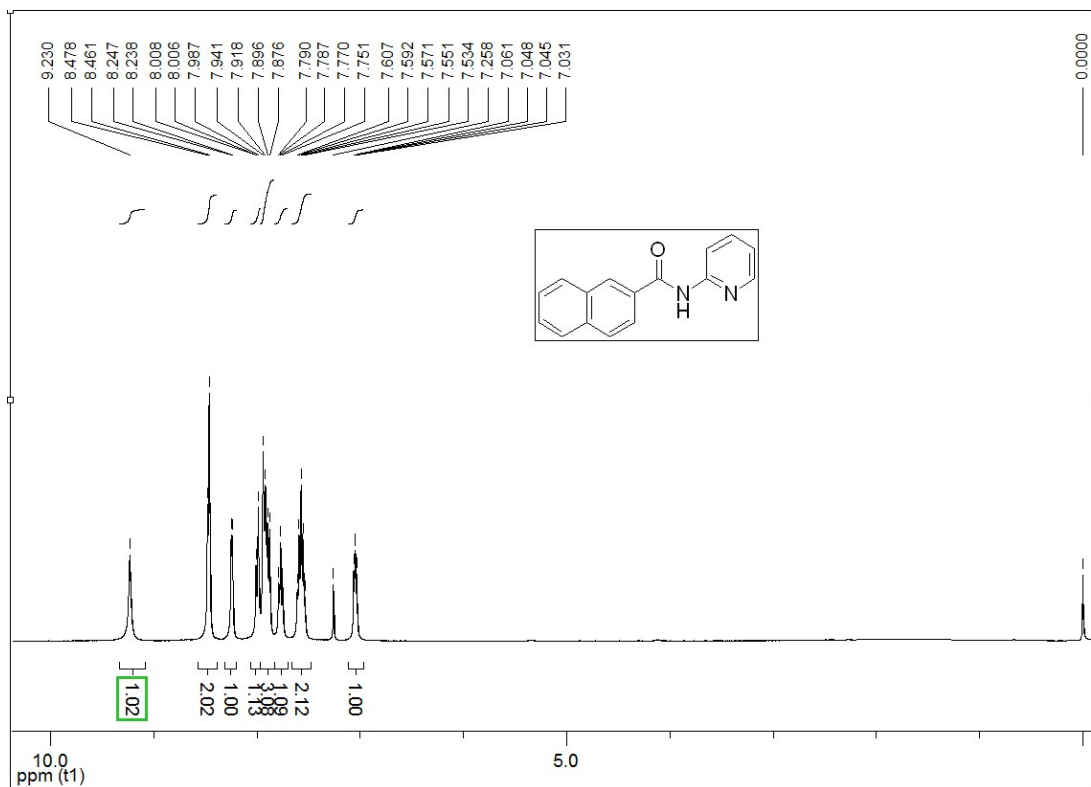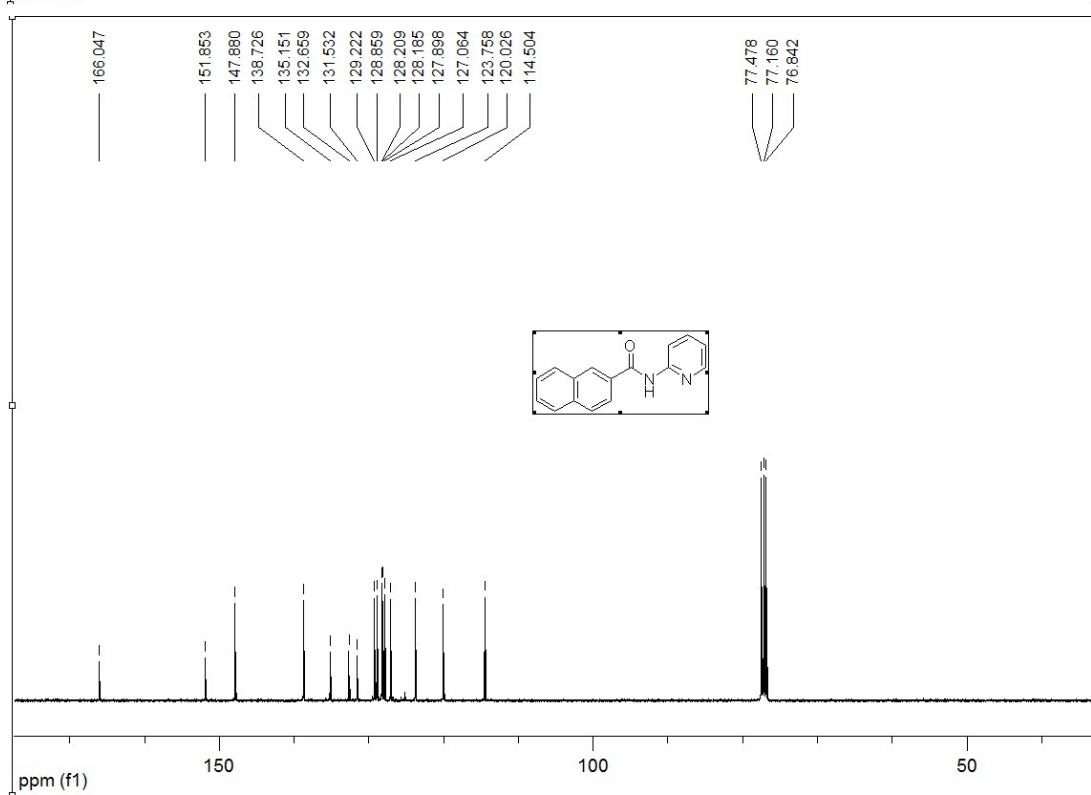

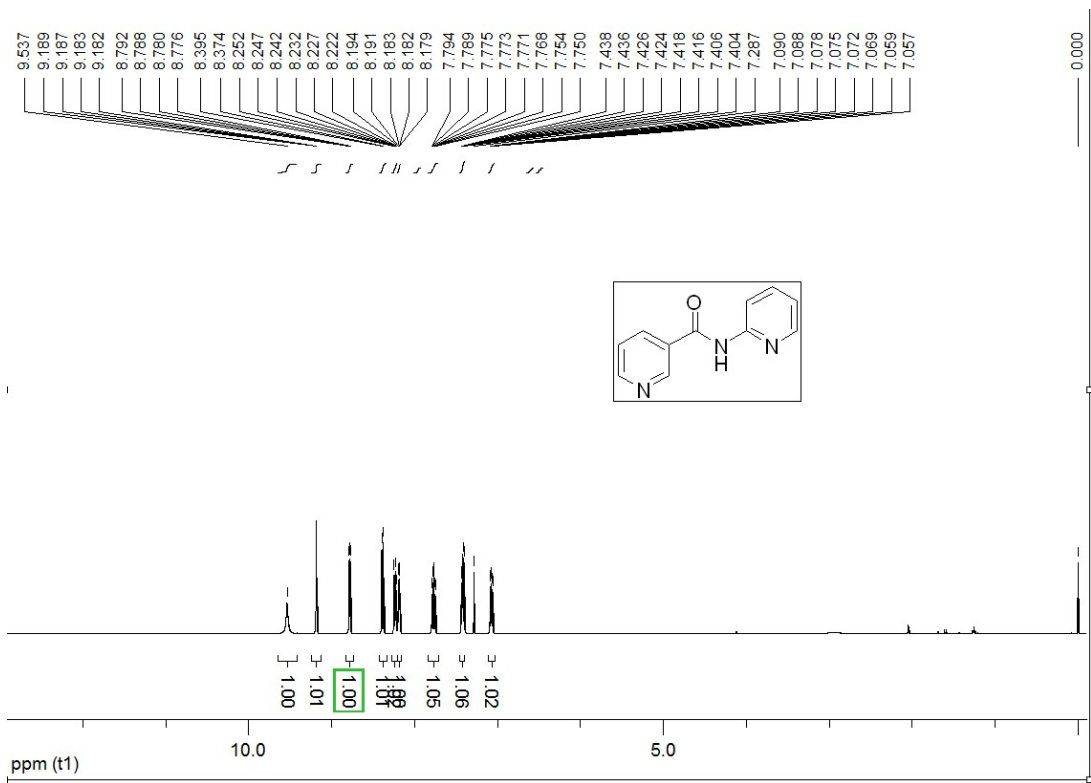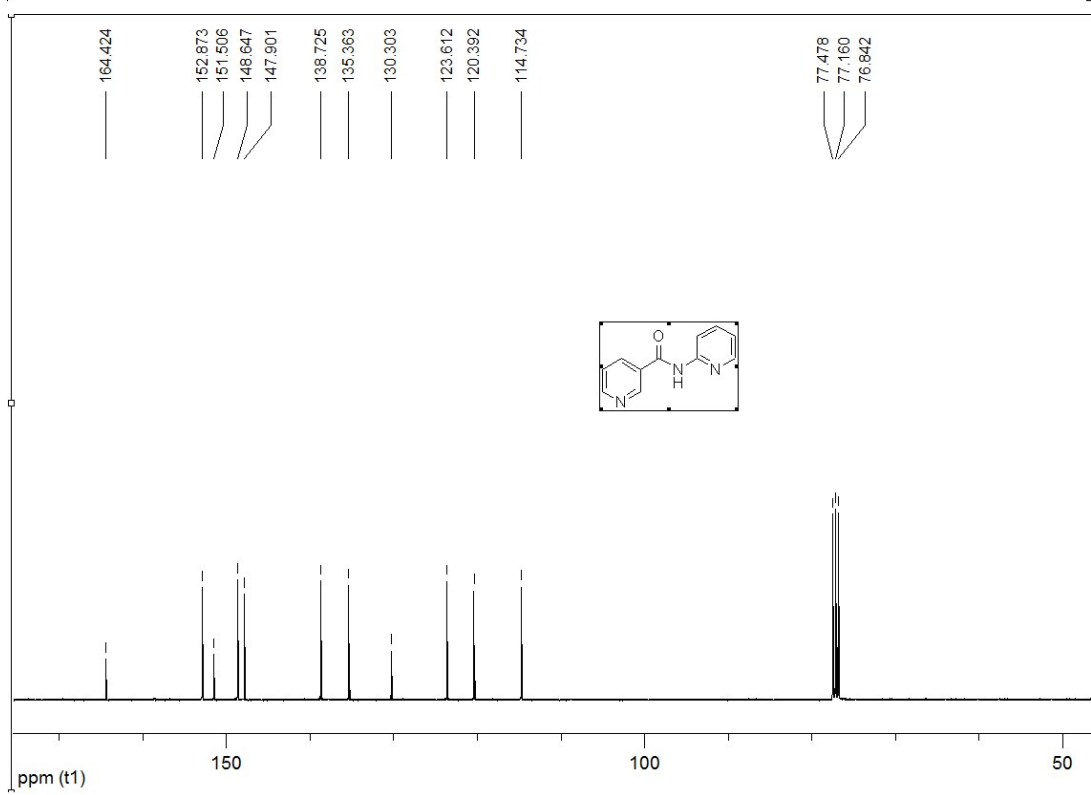

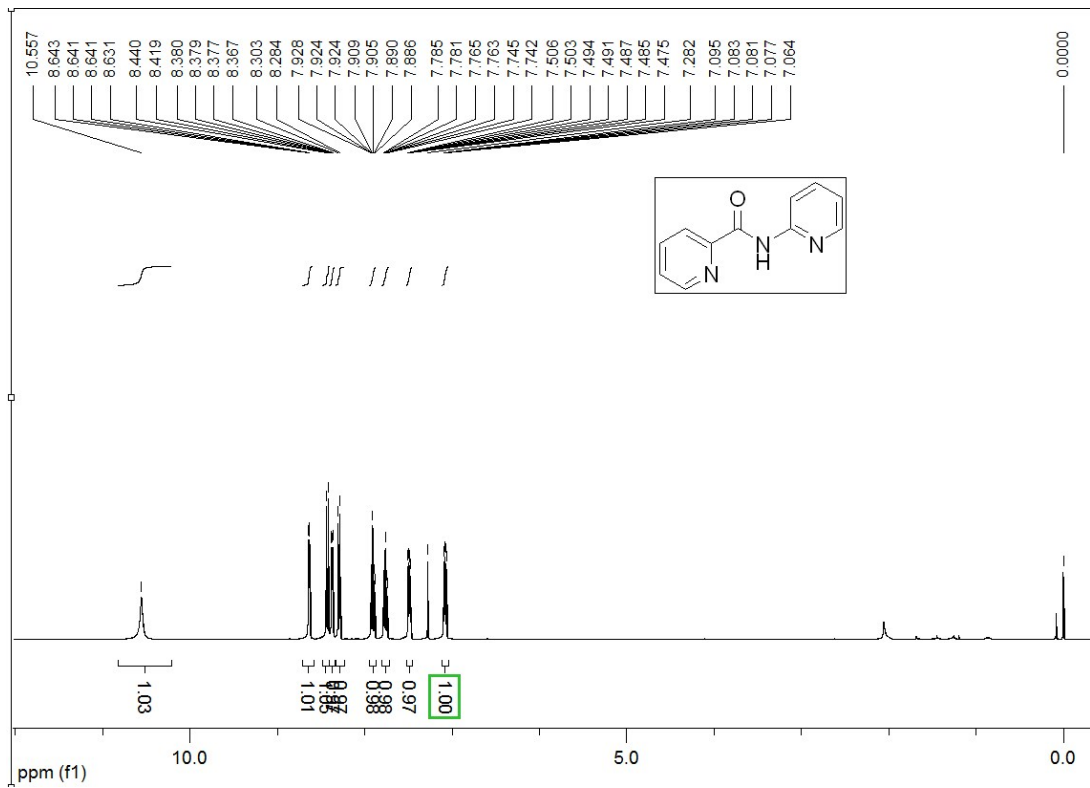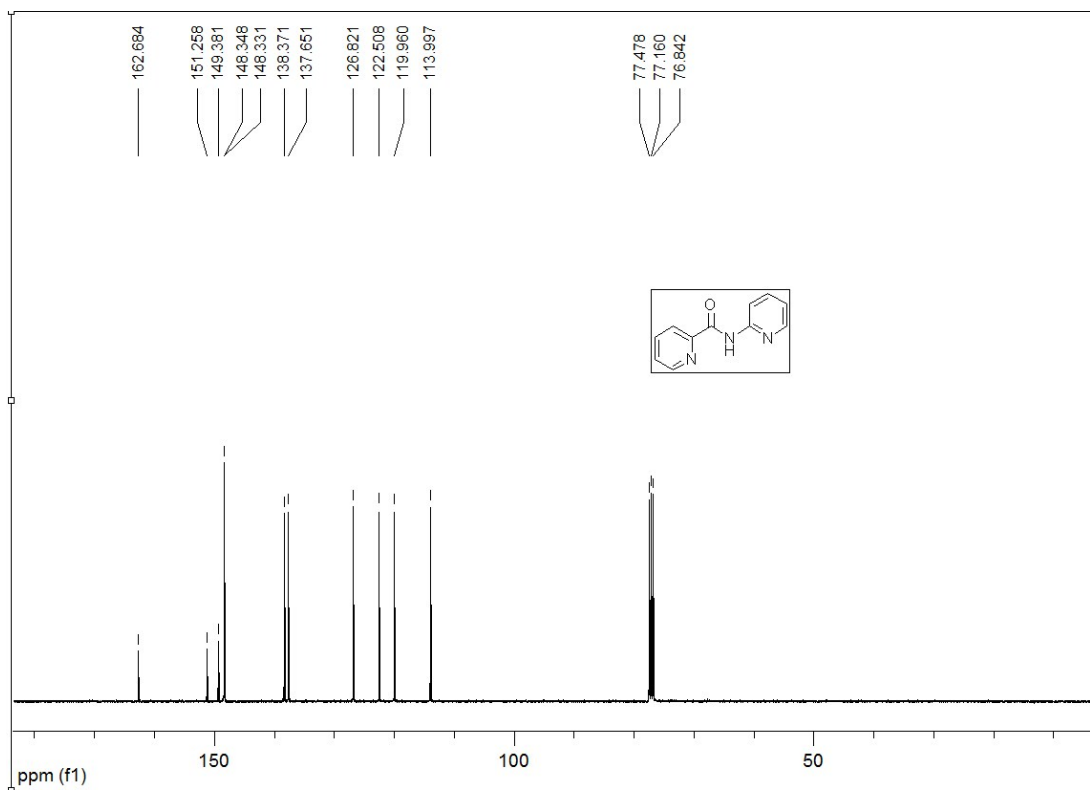

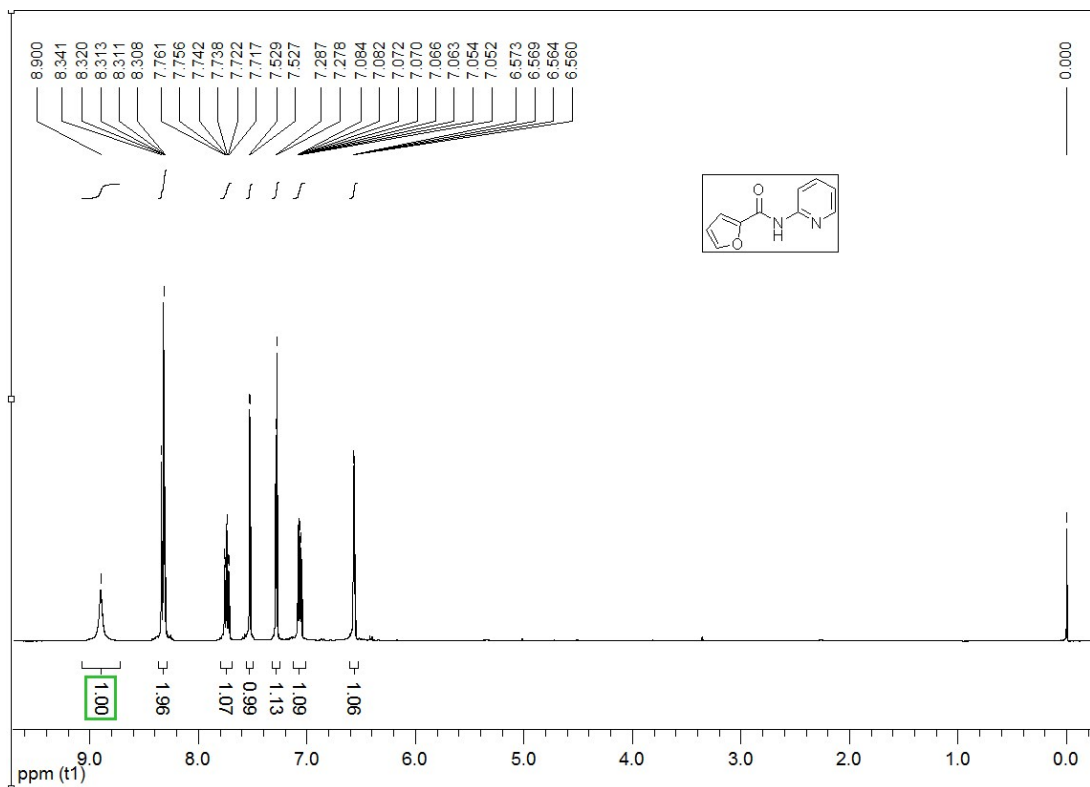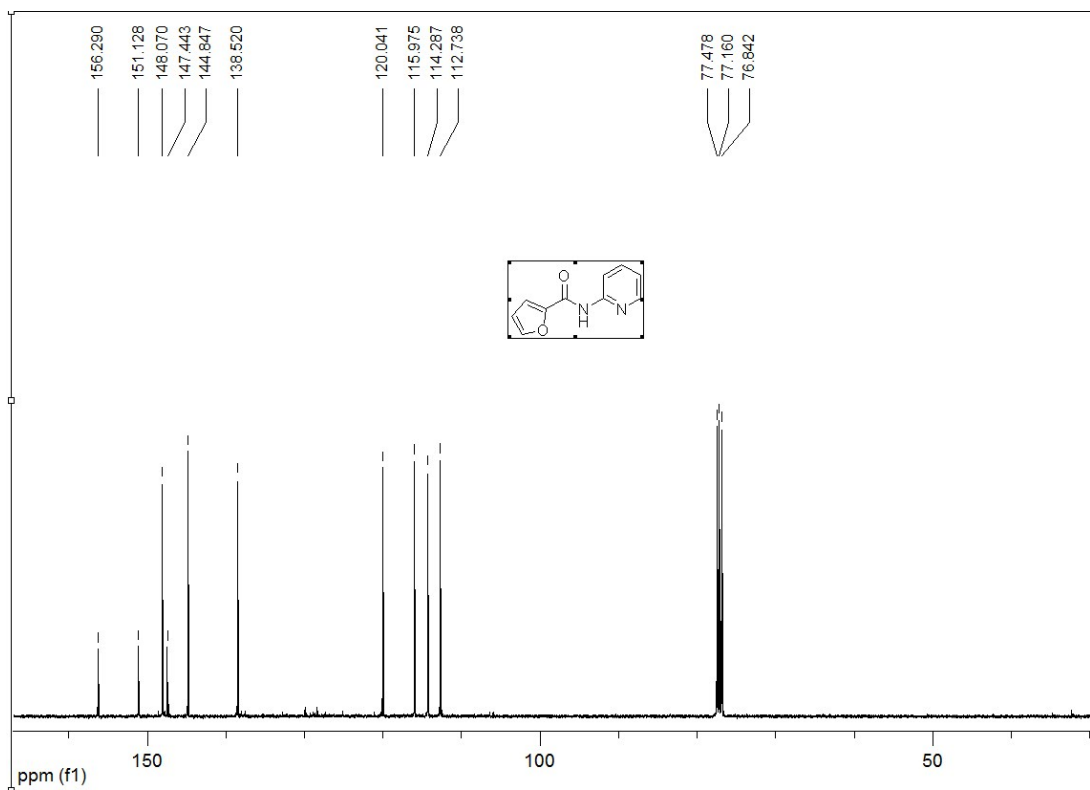

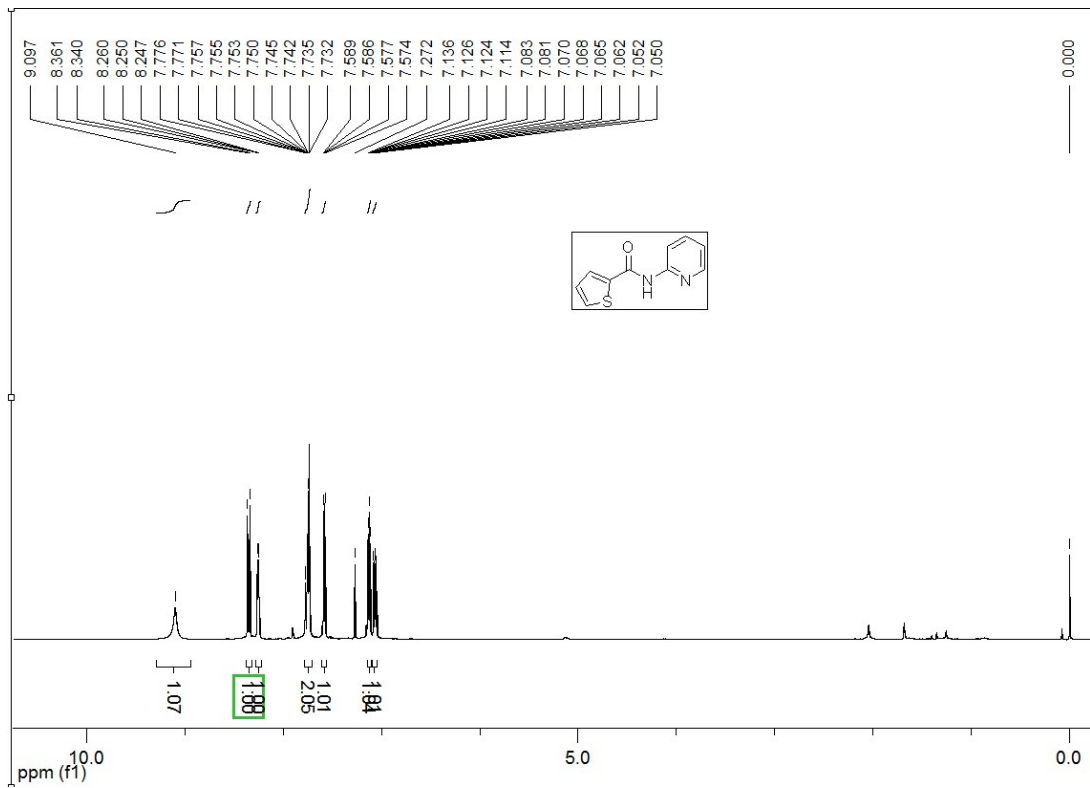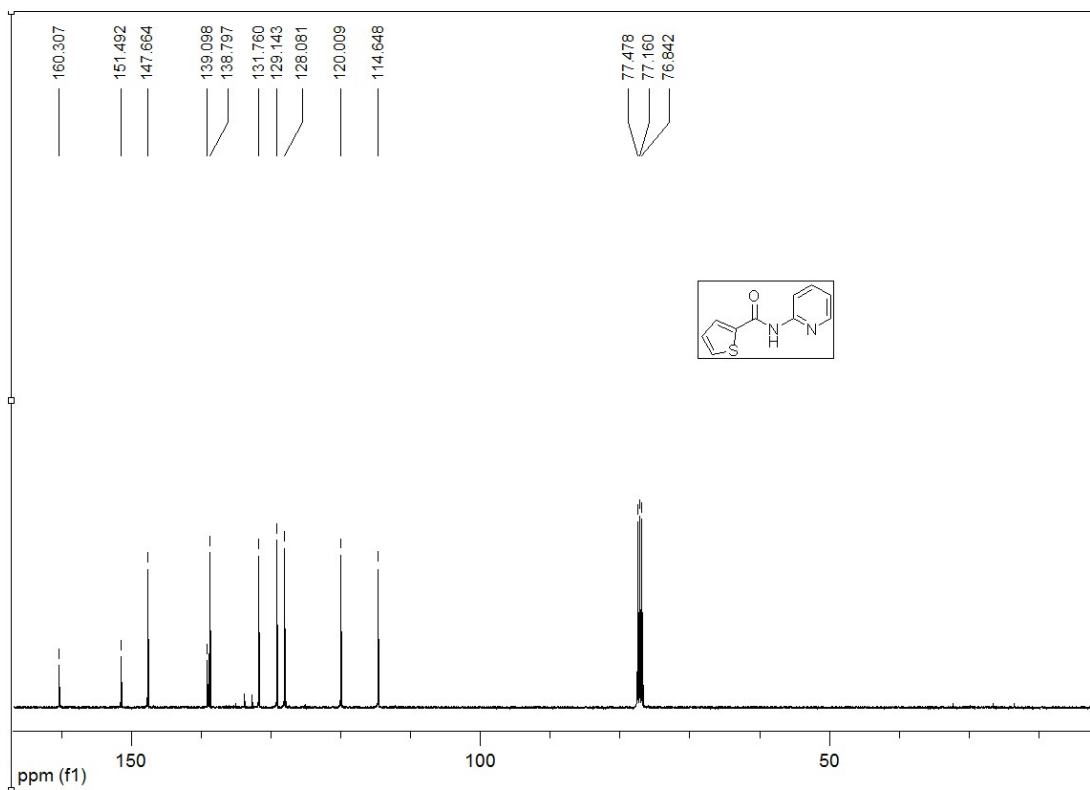

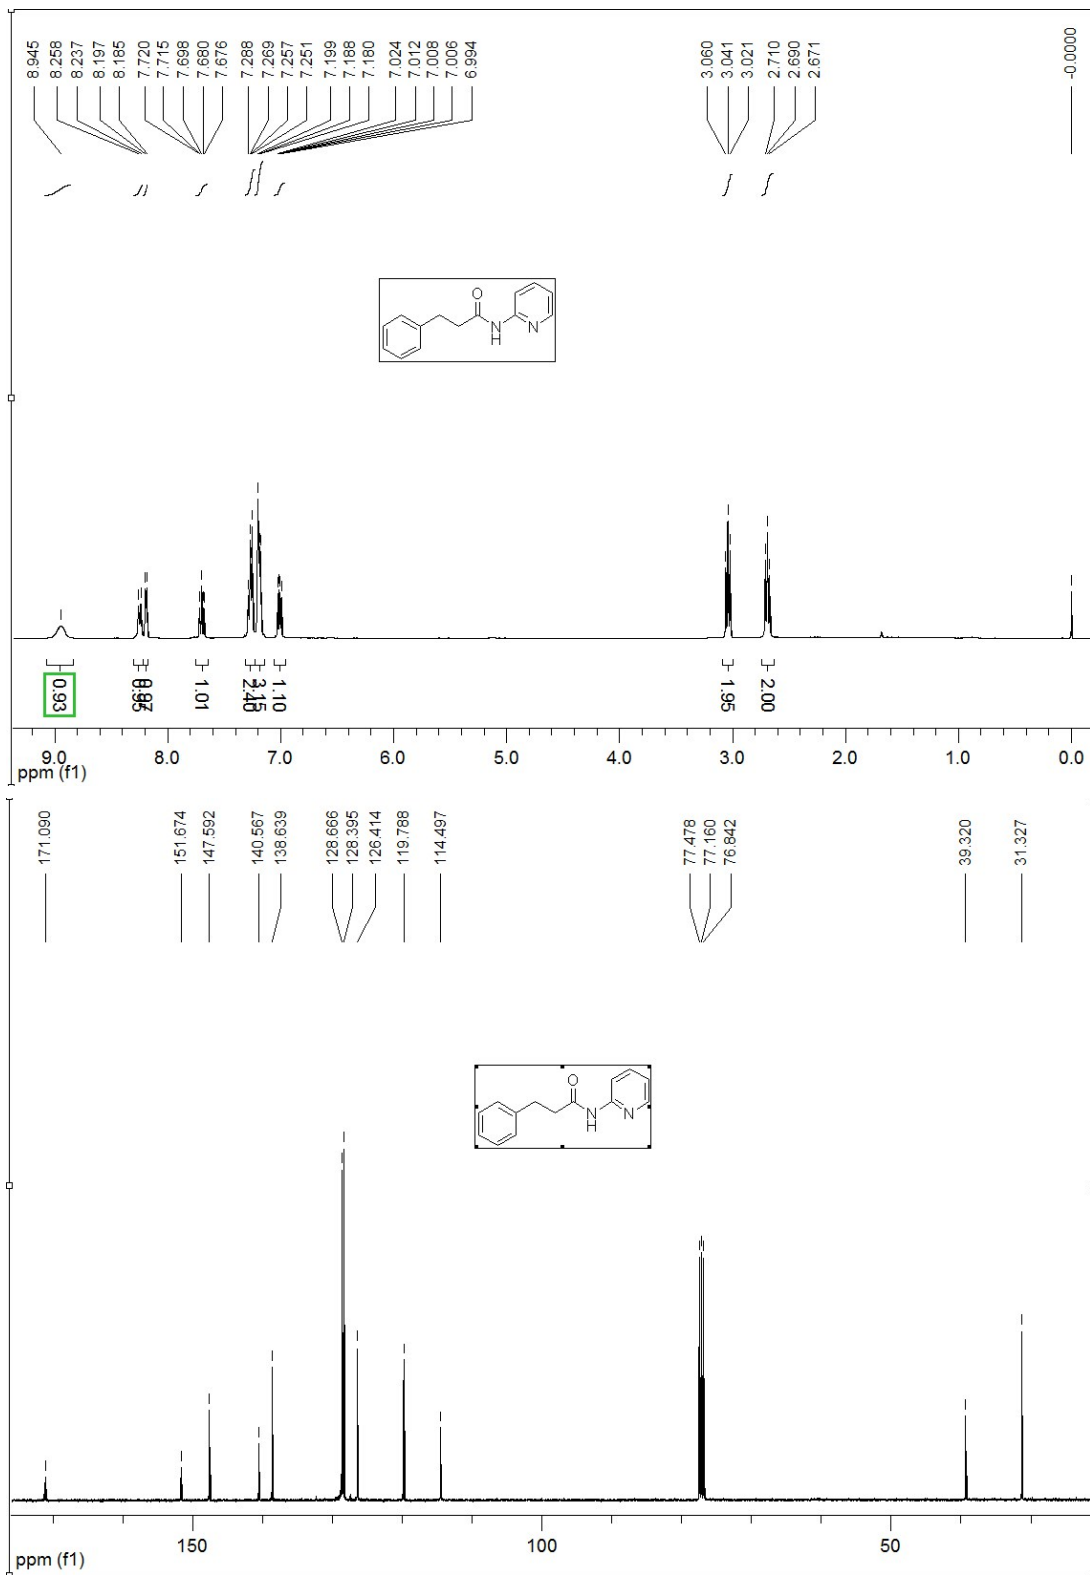

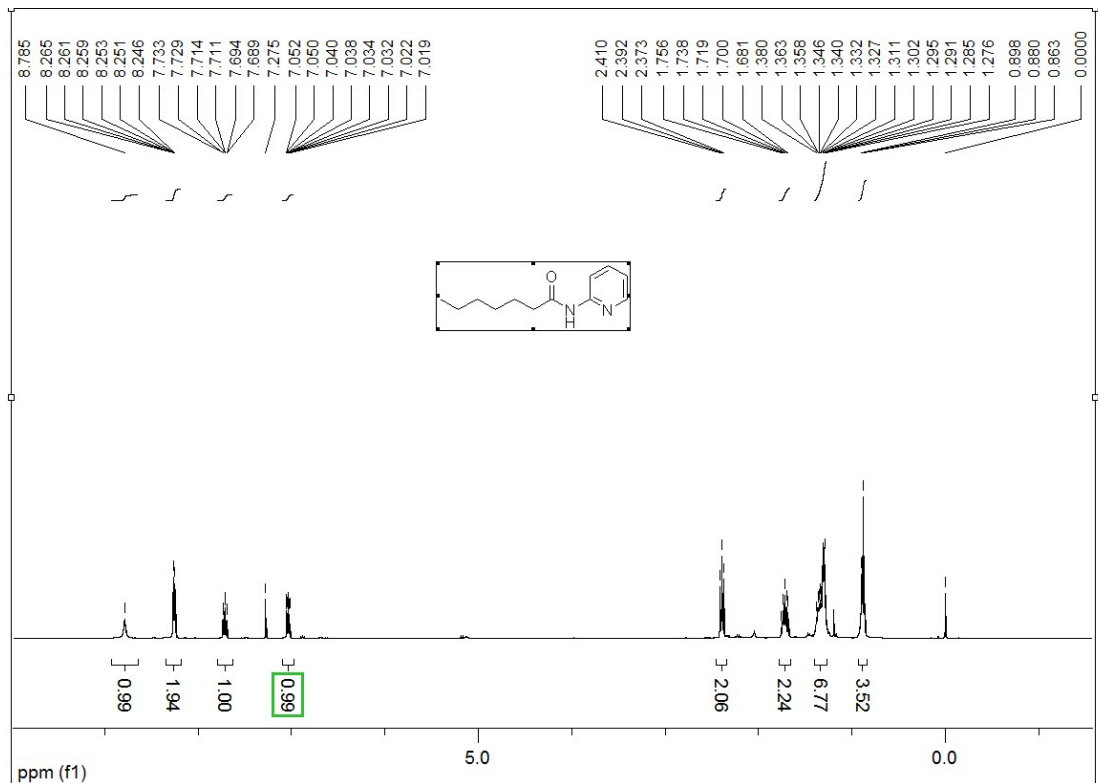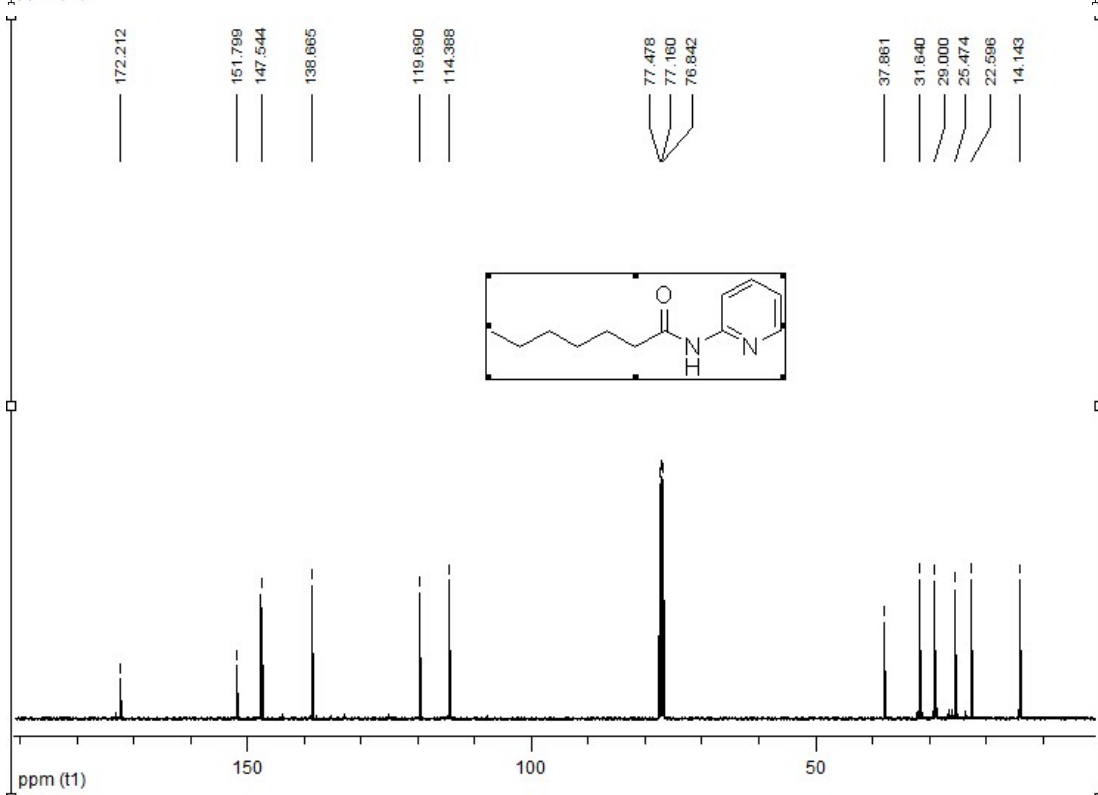

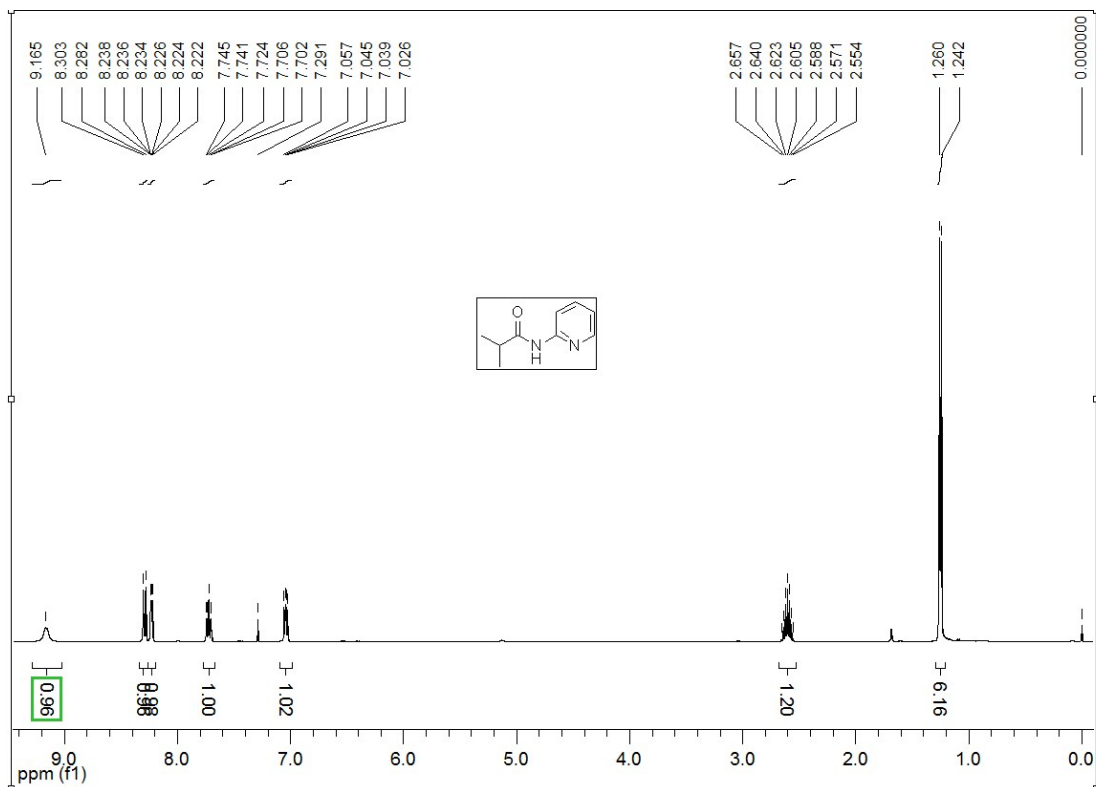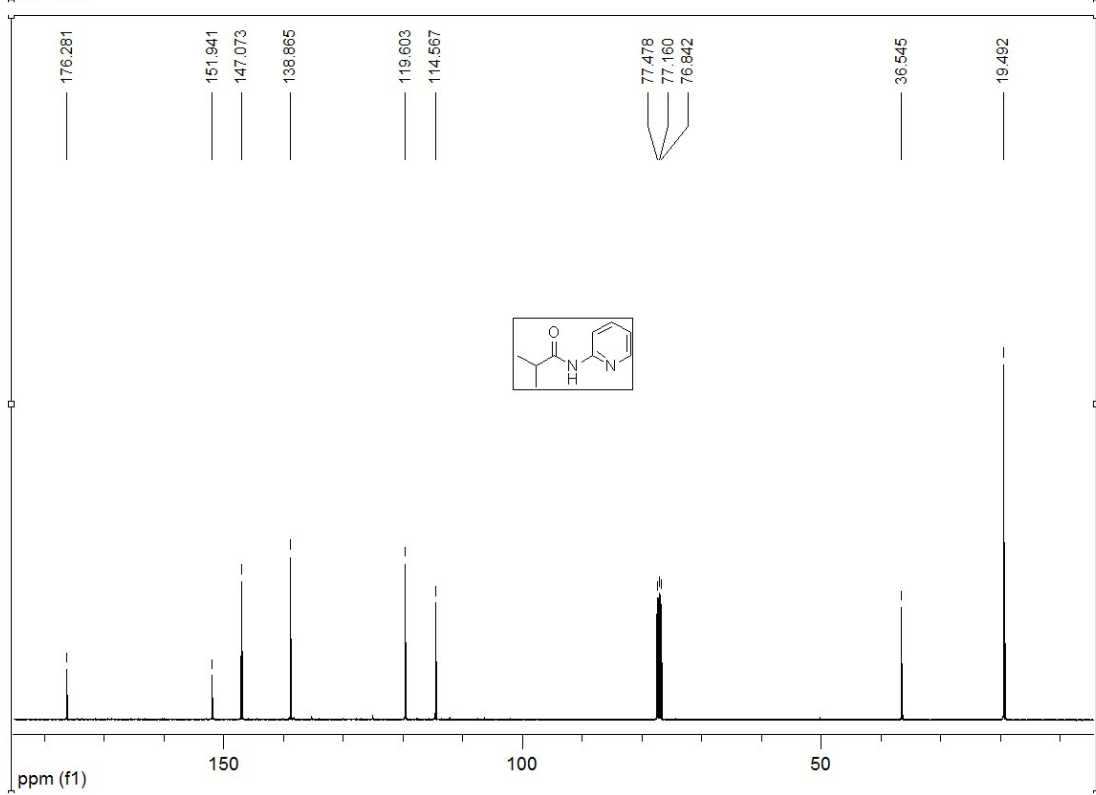



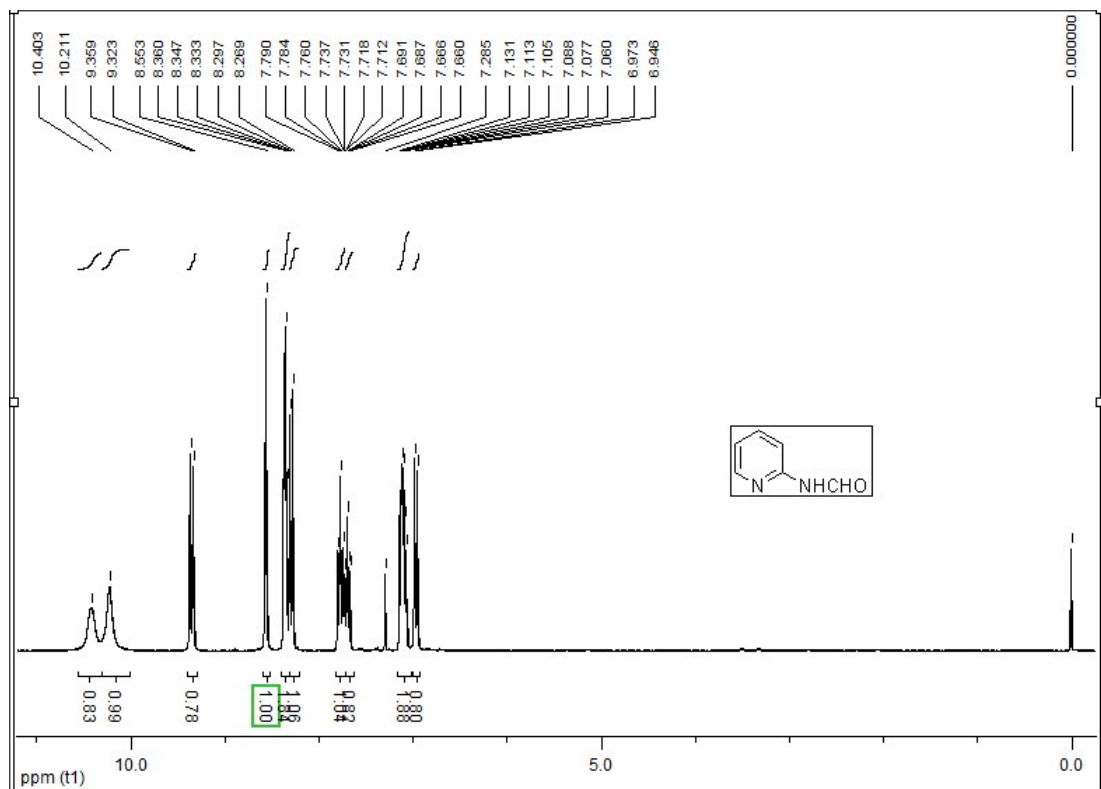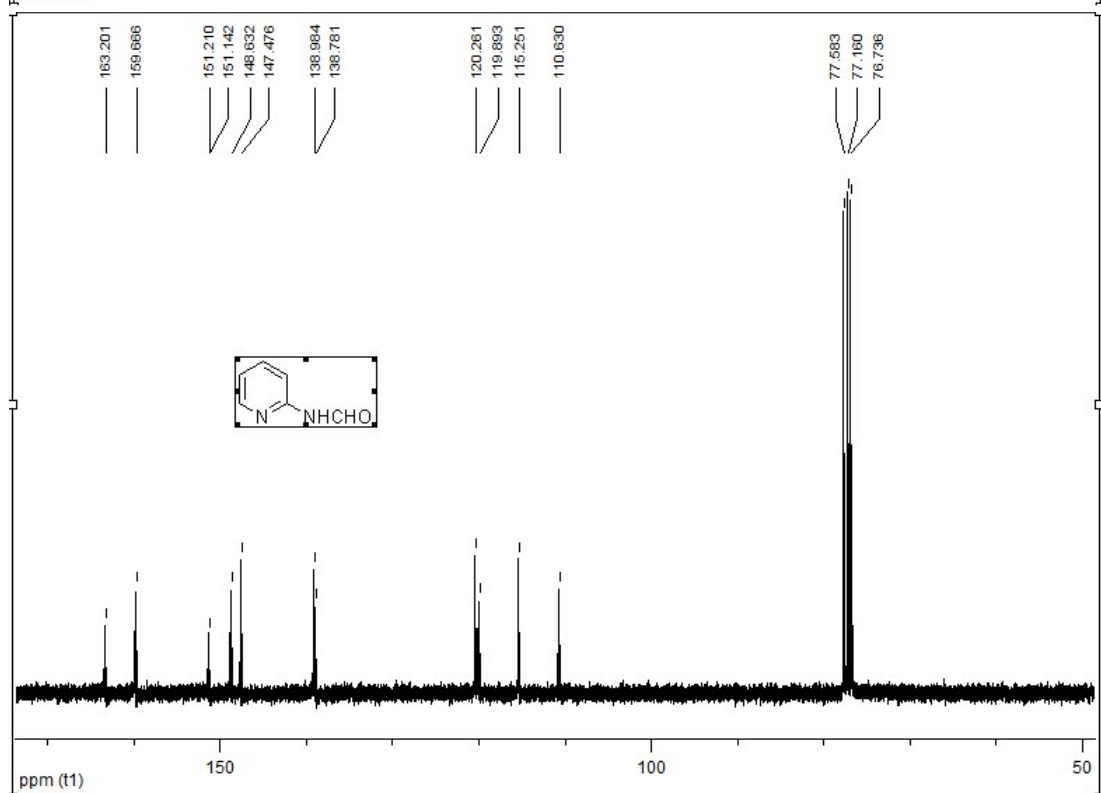

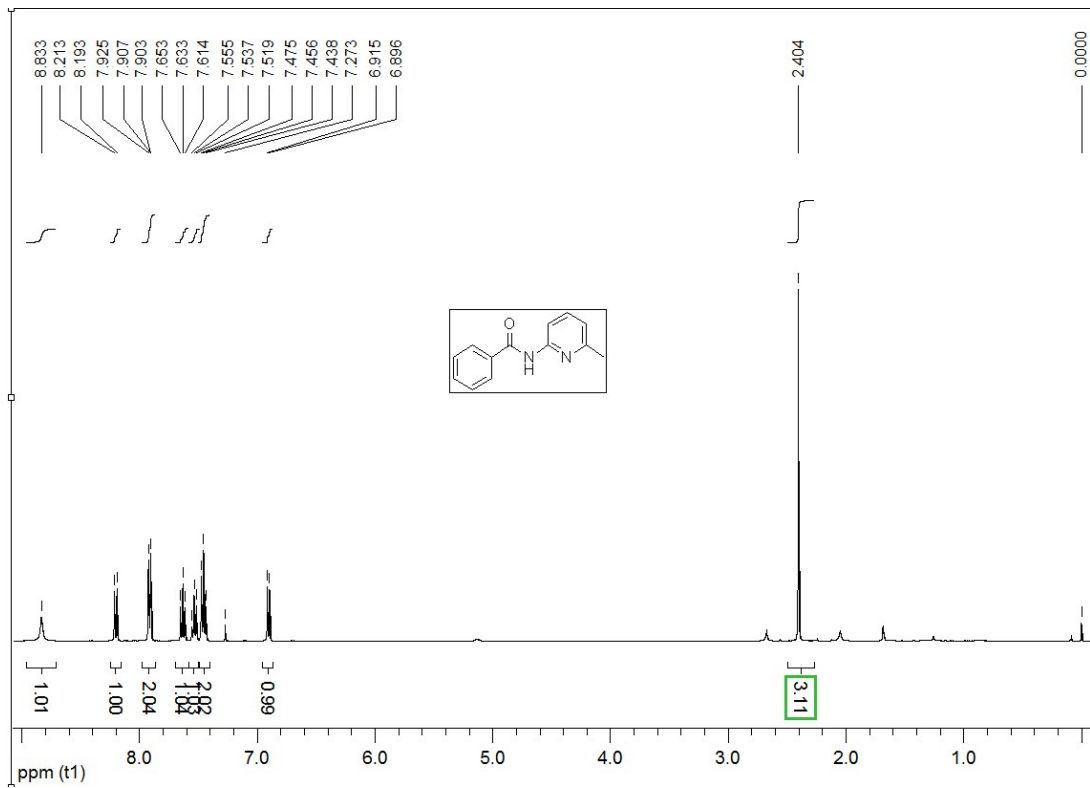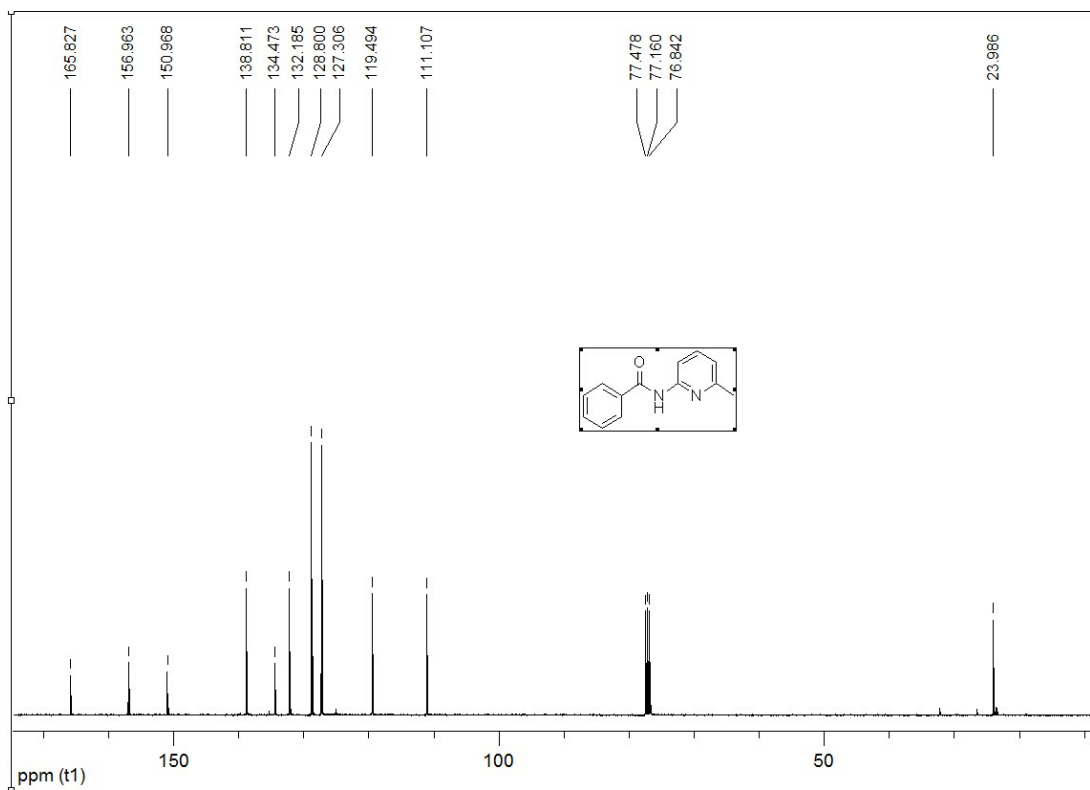

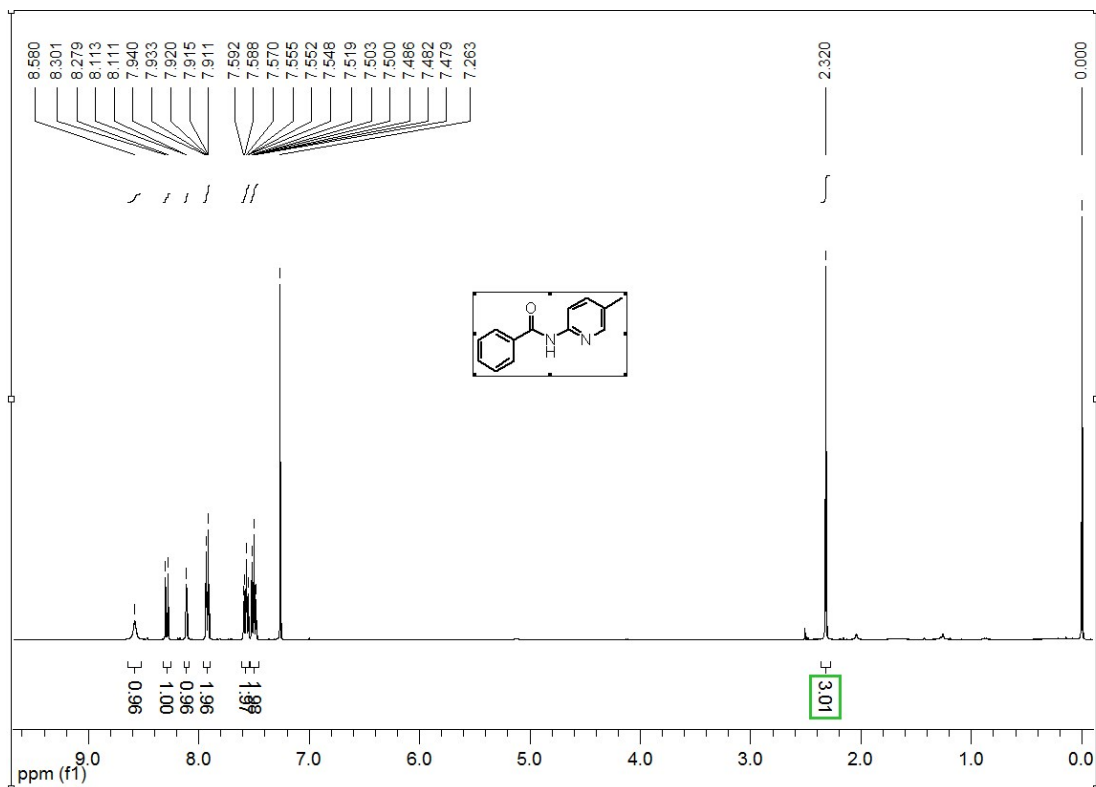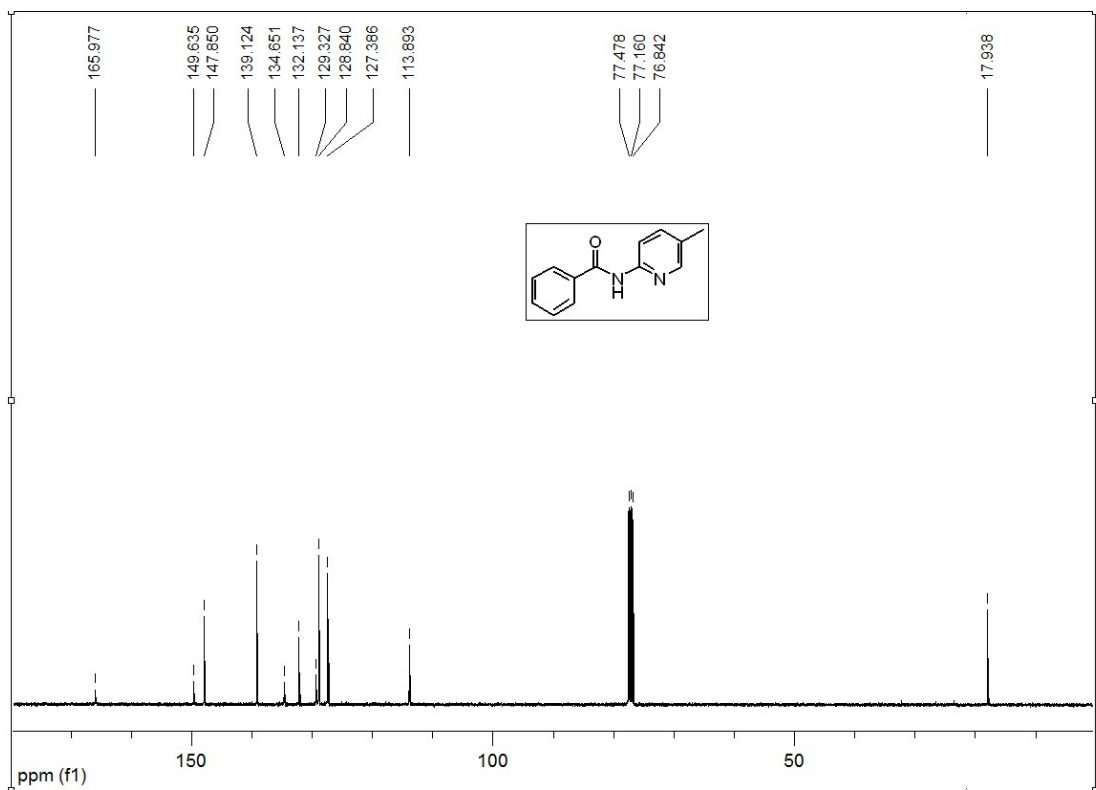

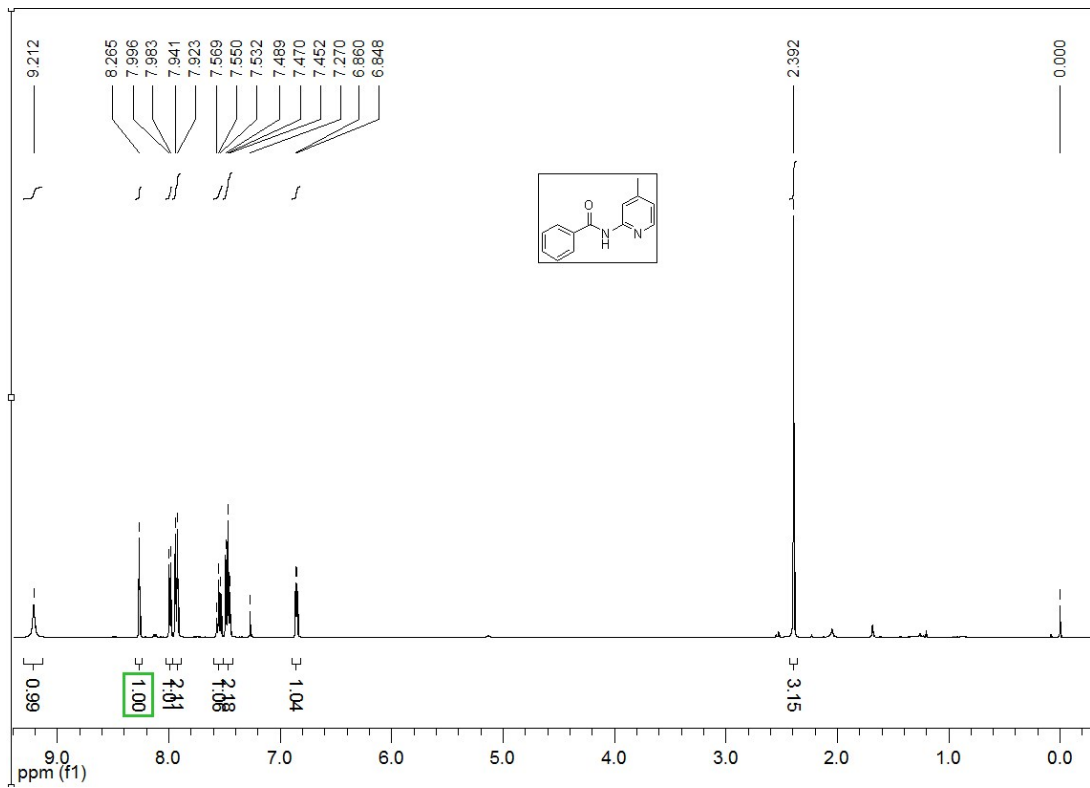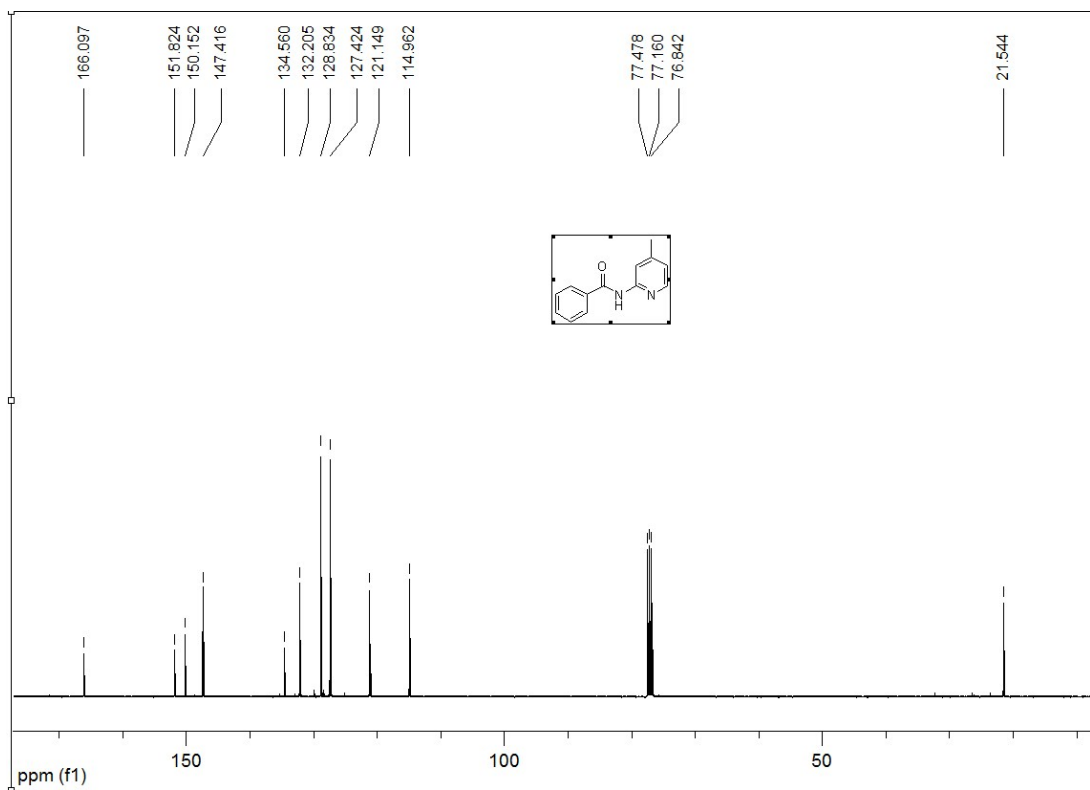

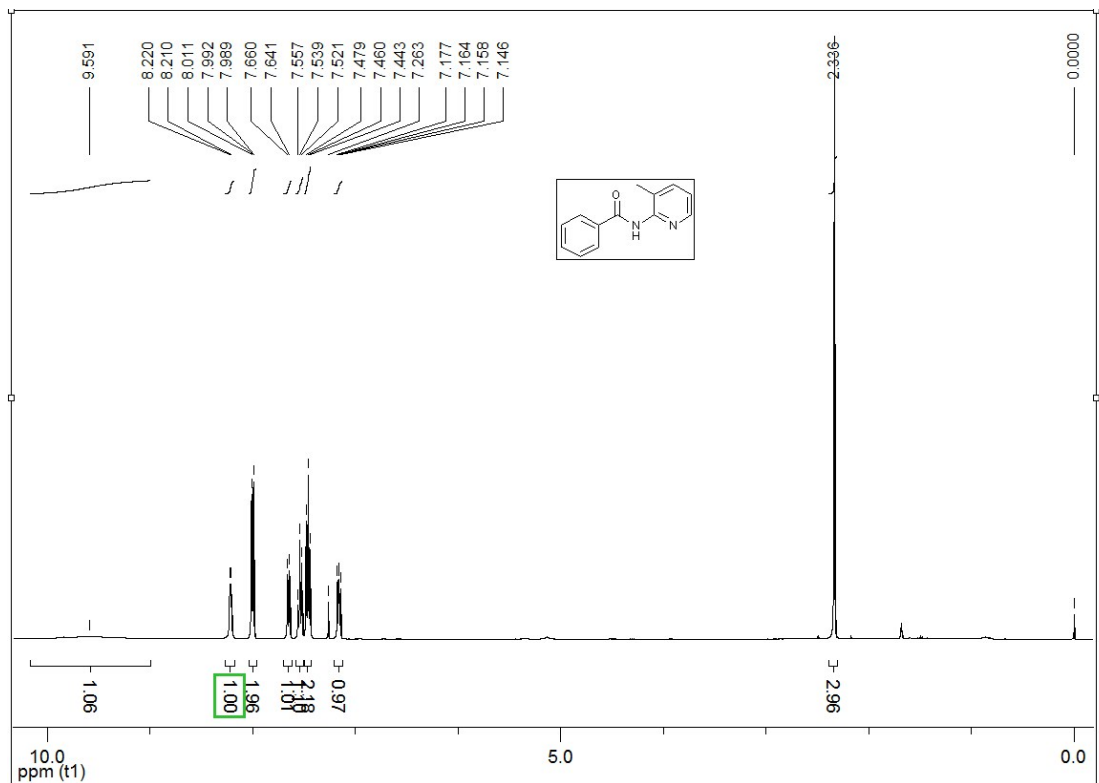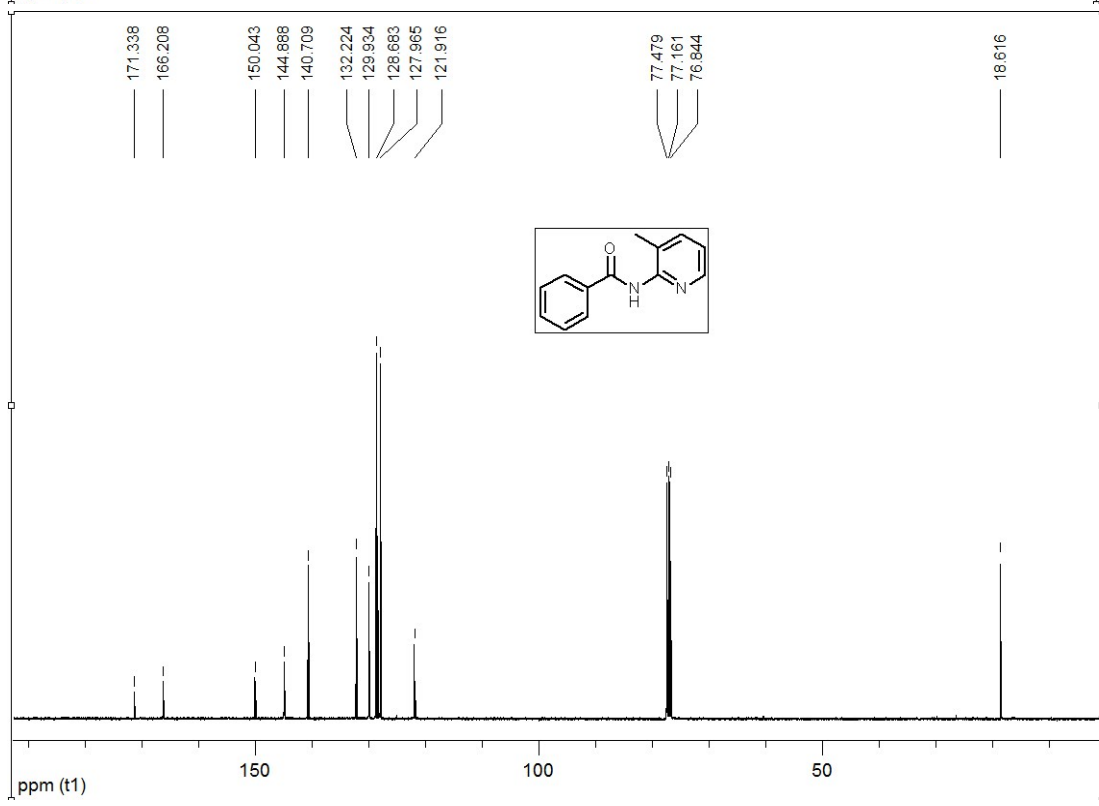



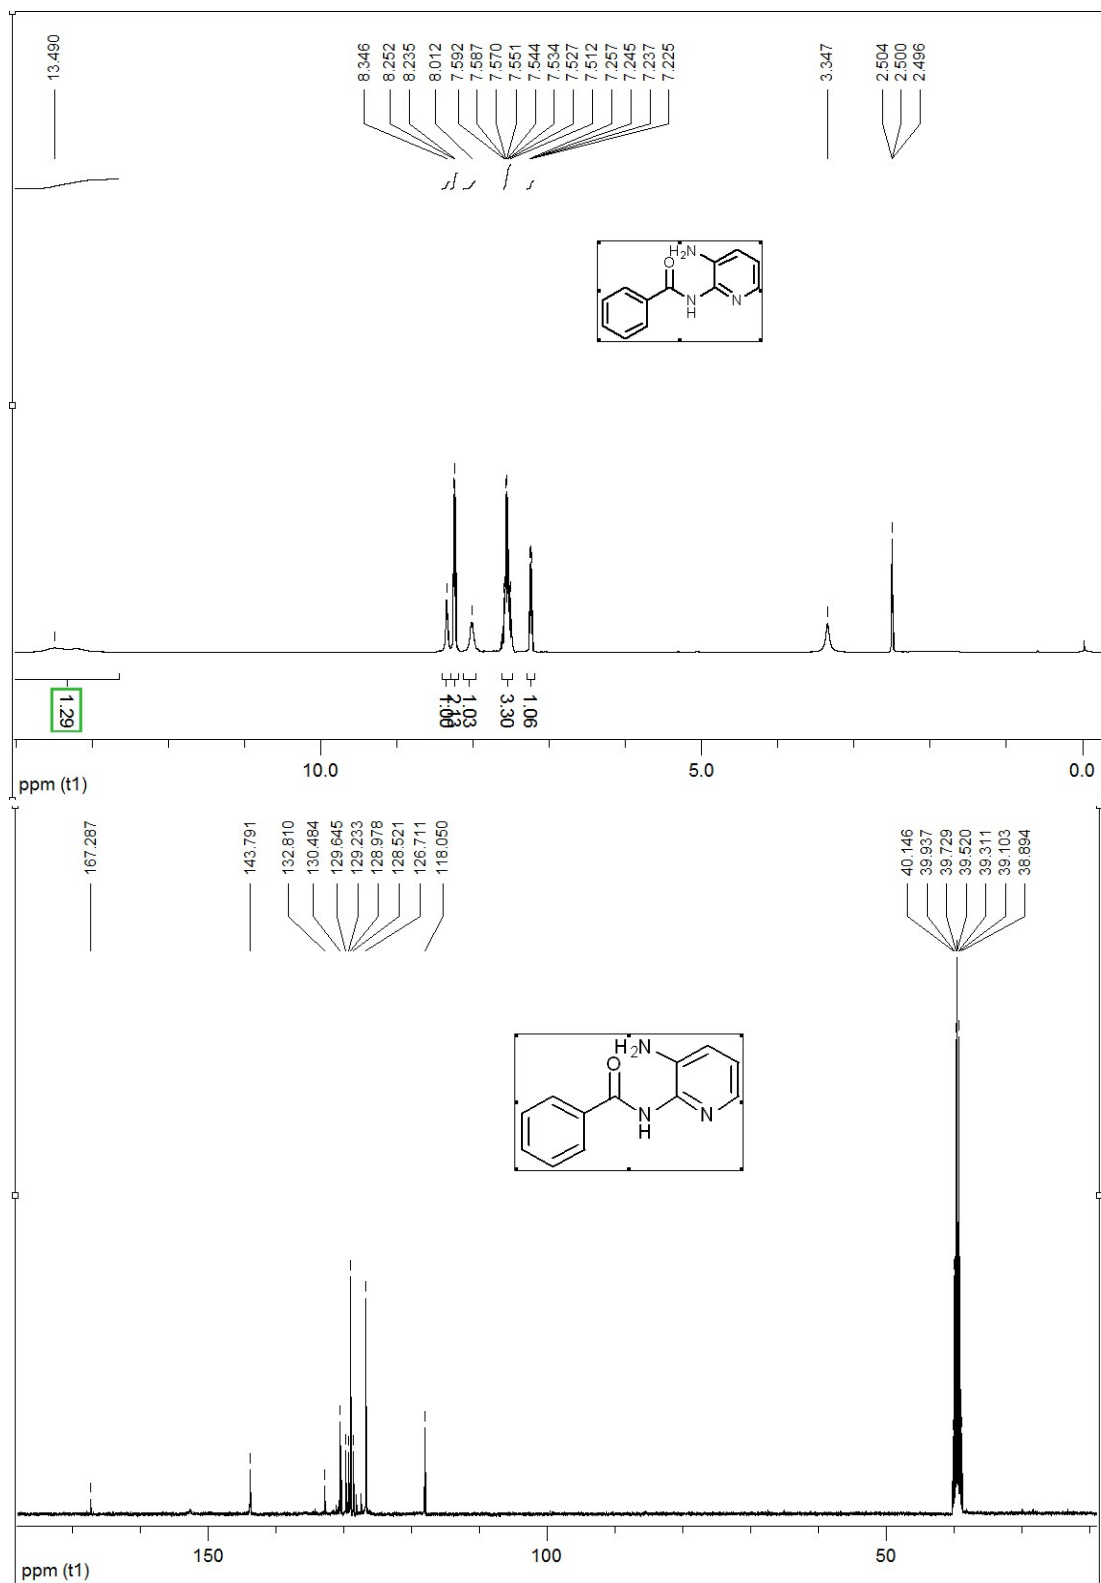

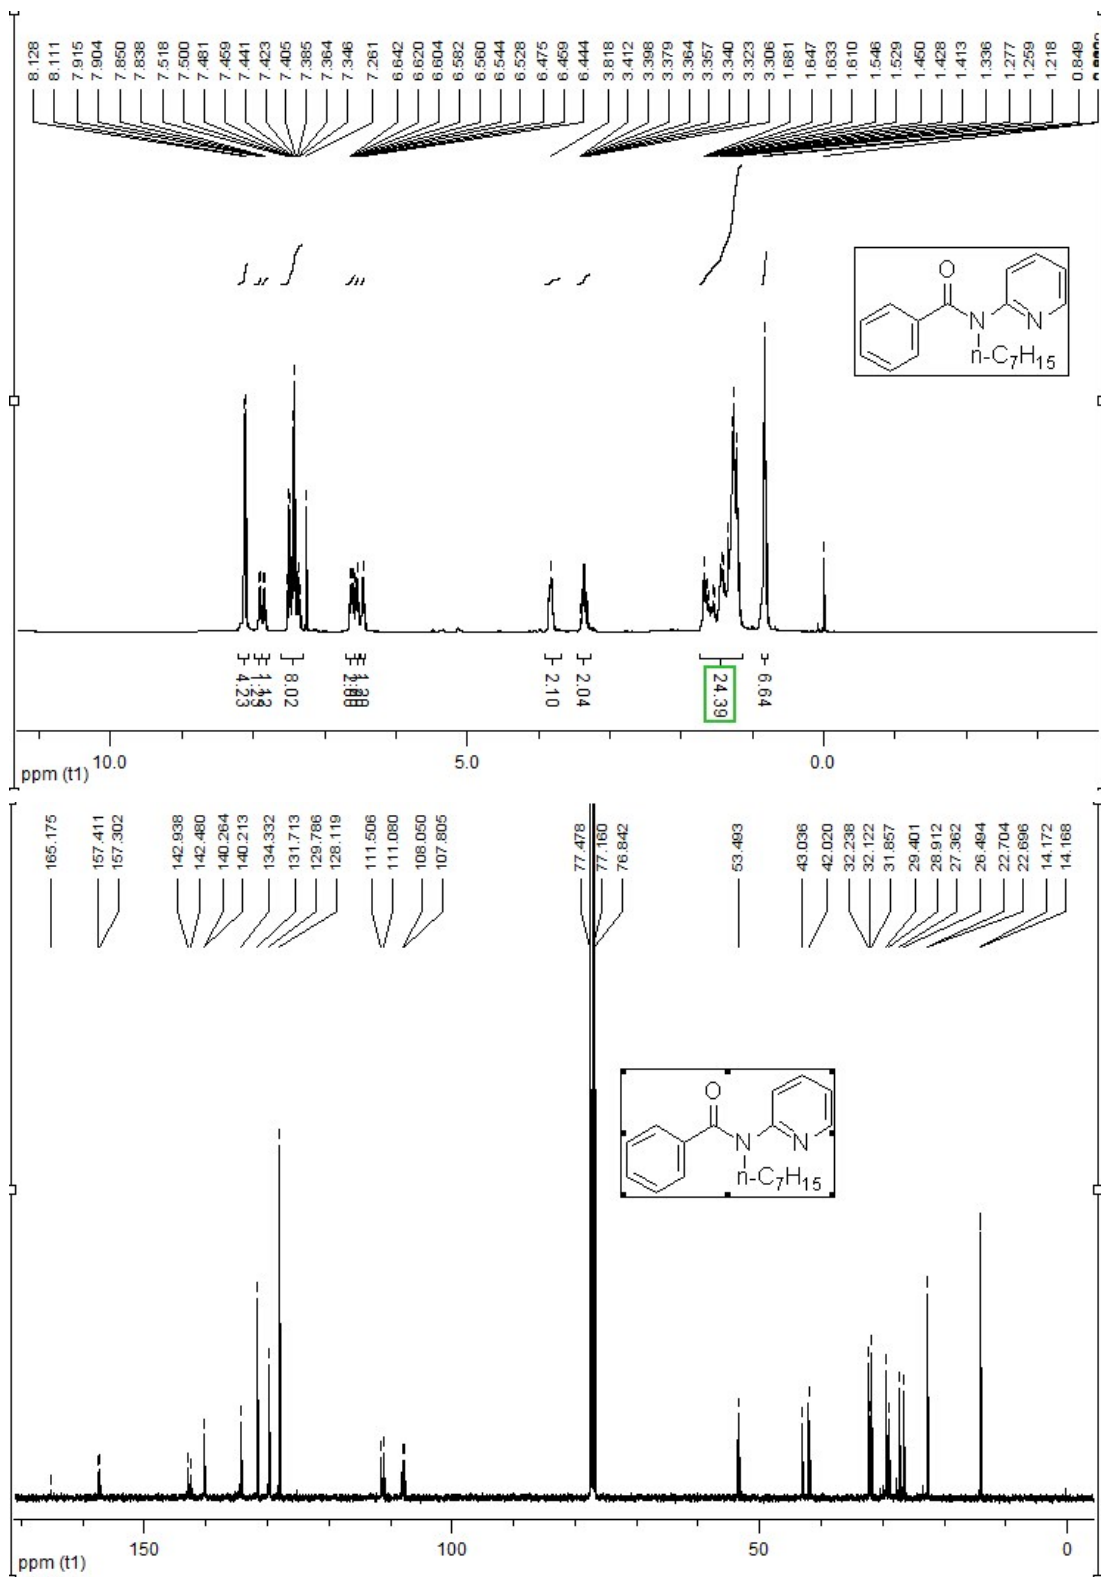



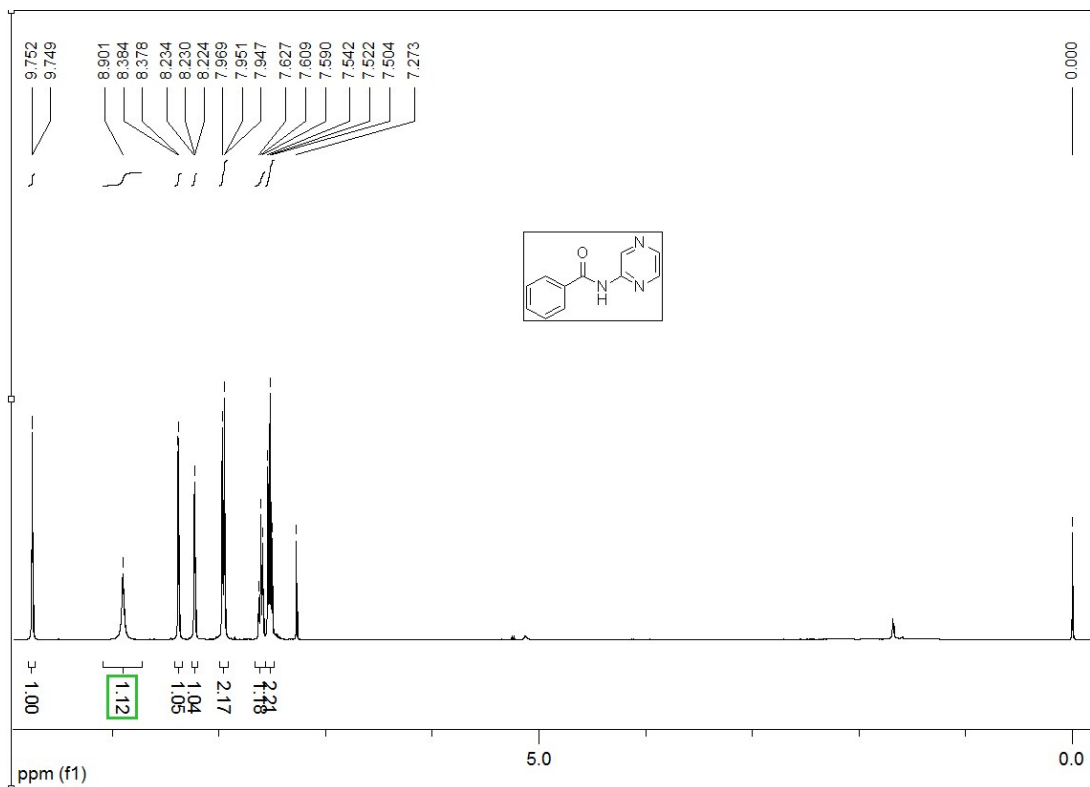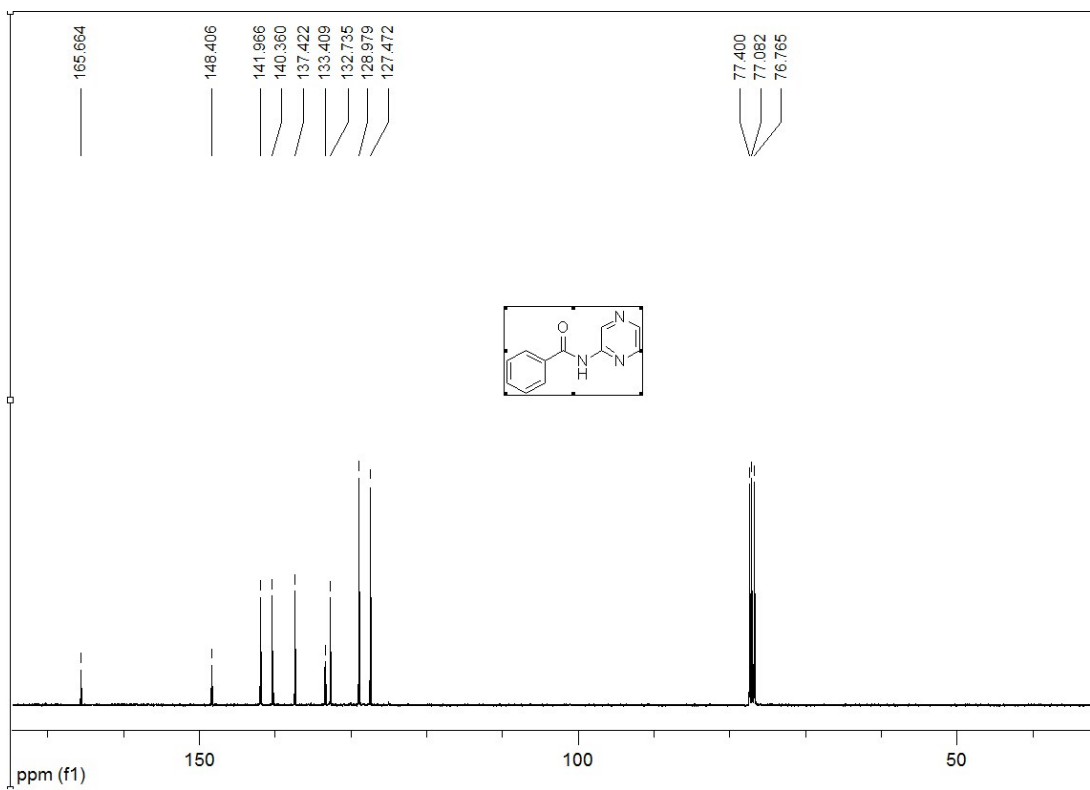

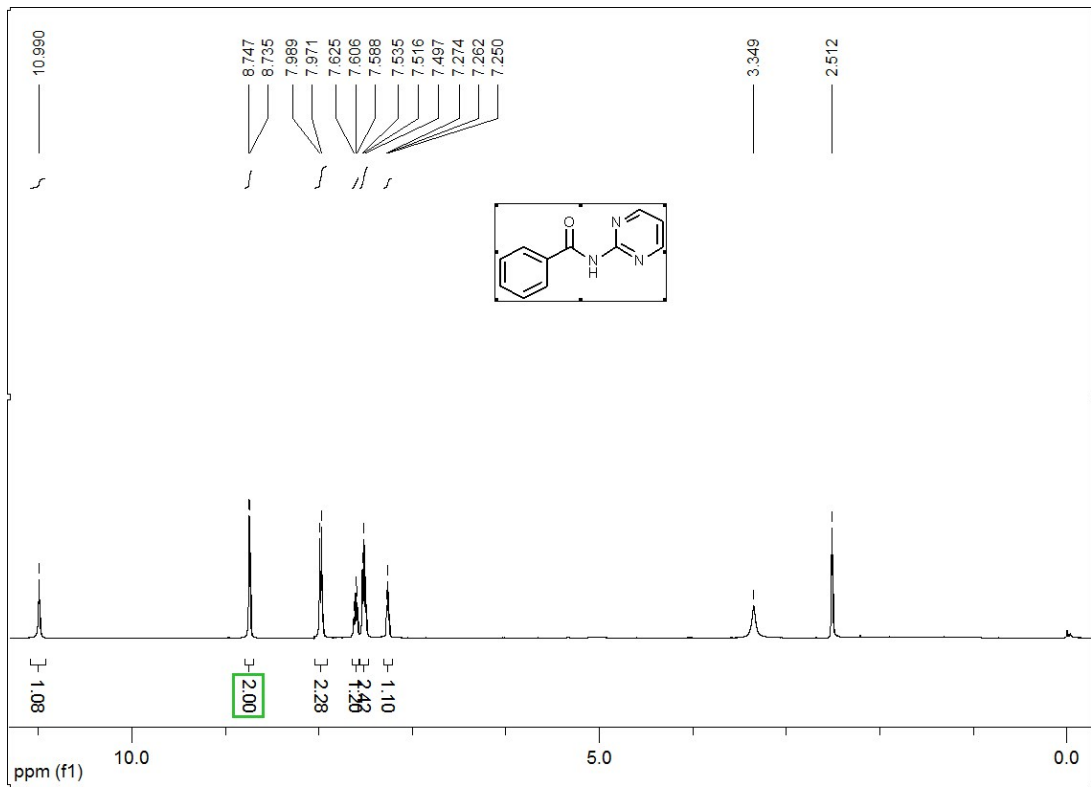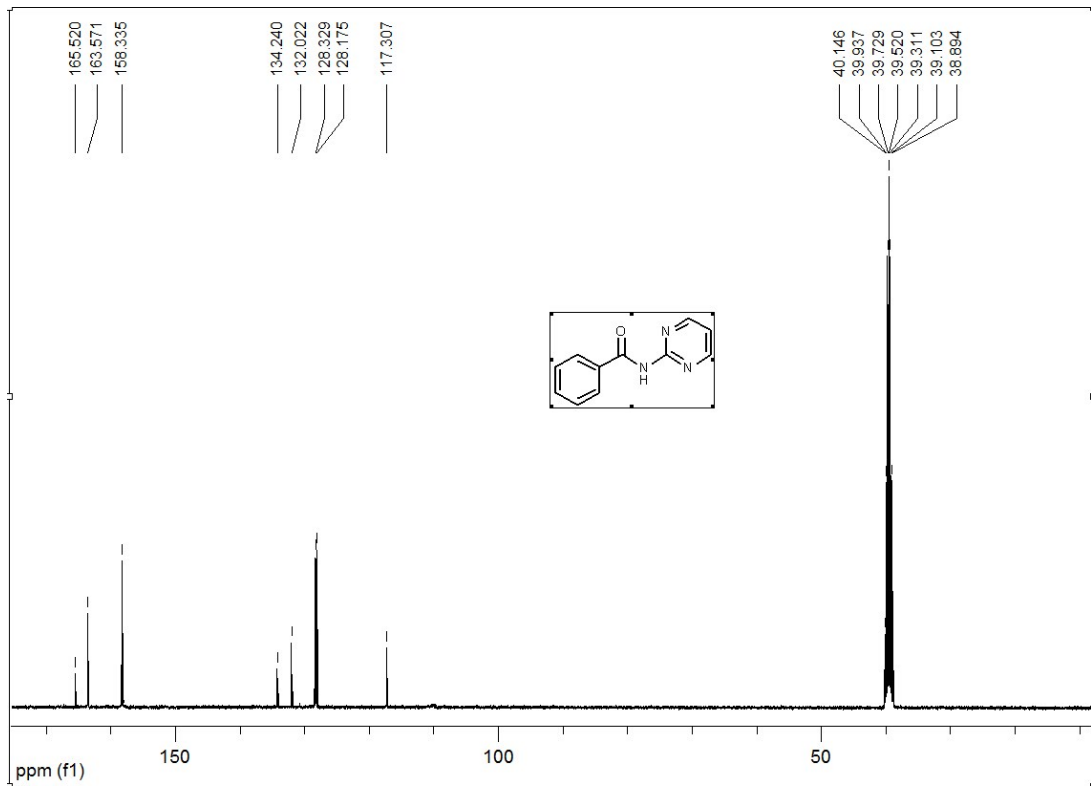





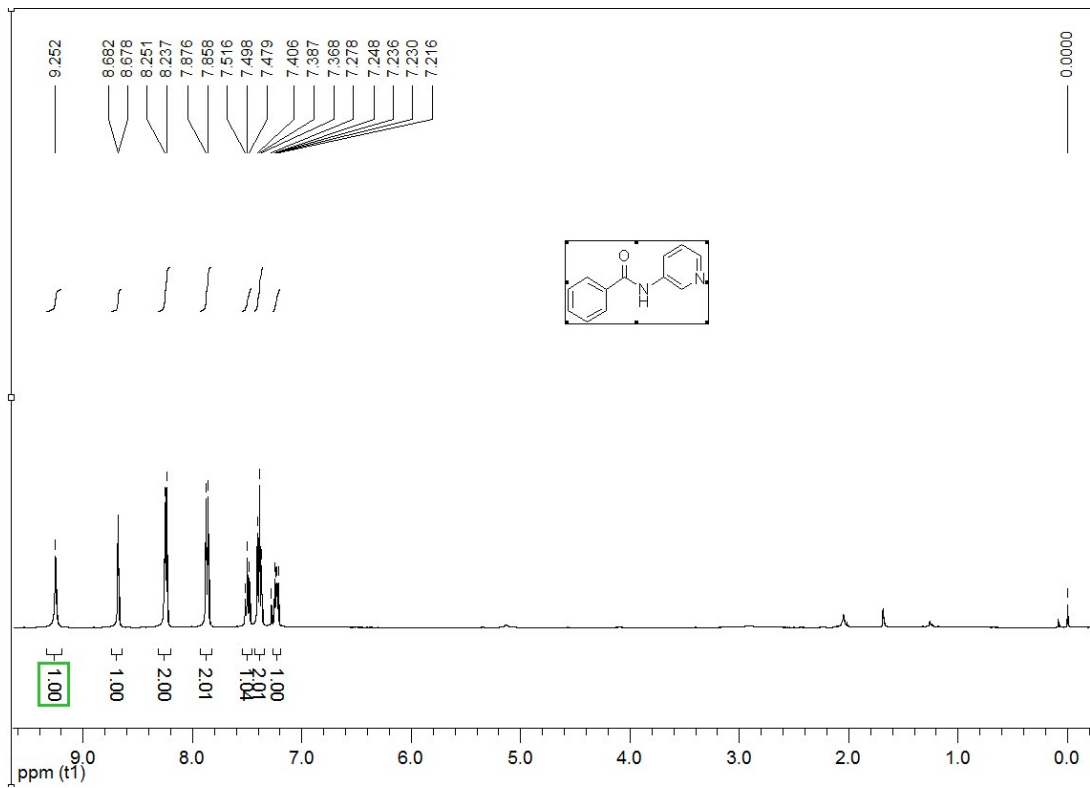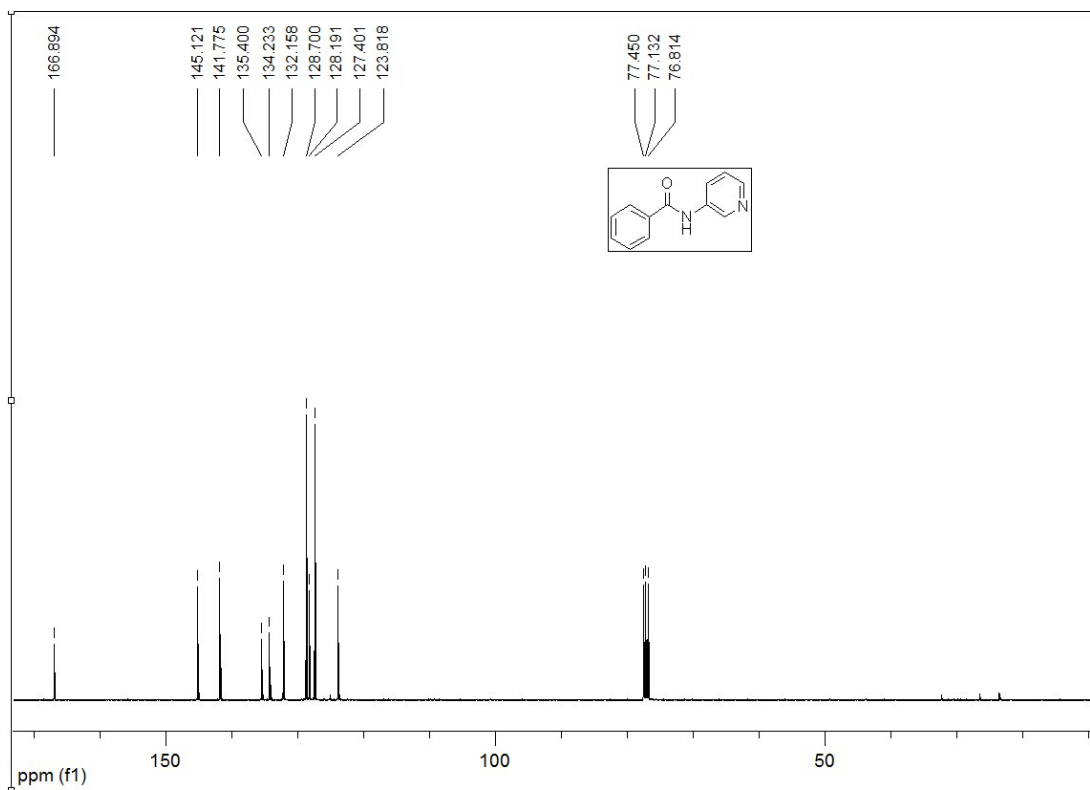

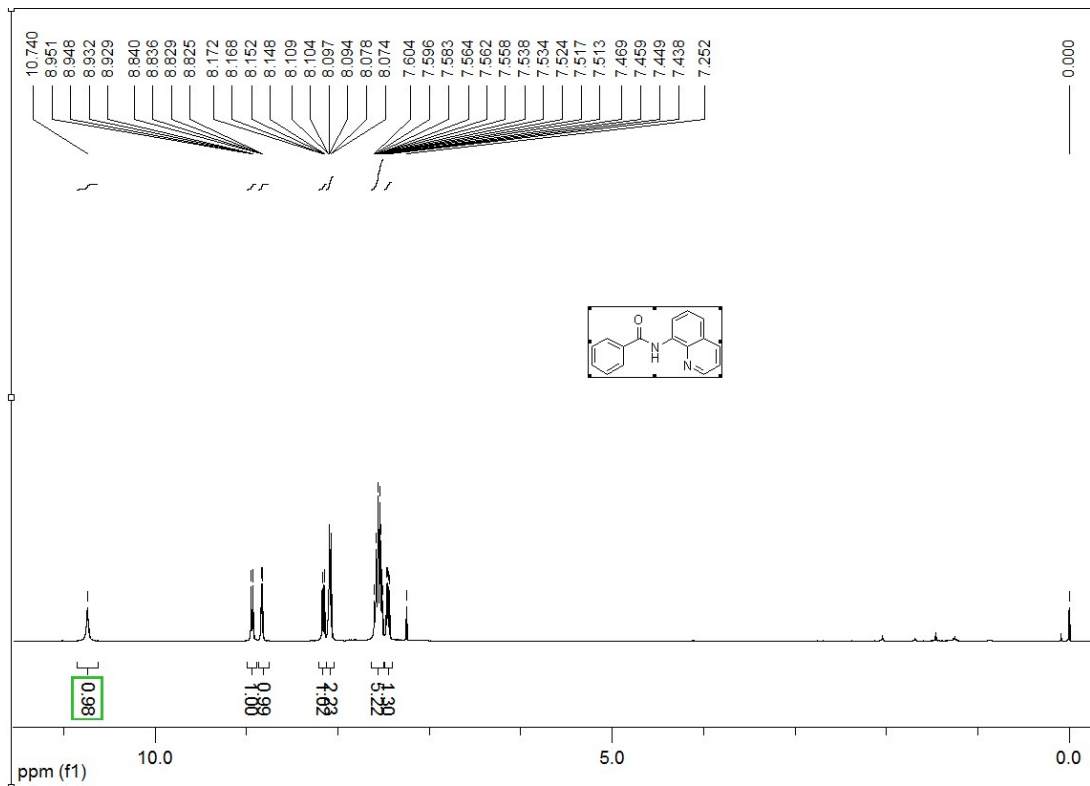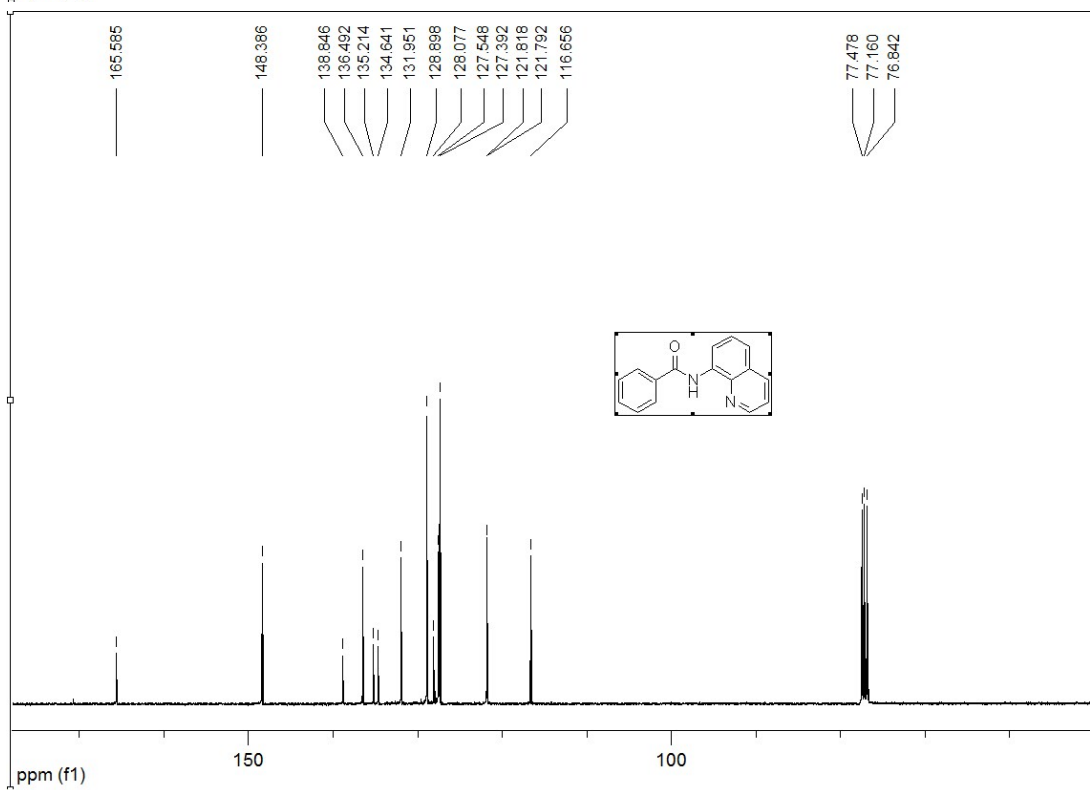

Supplement: c6ra20961k1.pdf [file c6ra20961k1.pdf]
